1 **Phanta: Phage-inclusive profiling of human gut metagenomes**

2

3 Yishay Pinto<sup>1,2,\*</sup>, Meenakshi Chakraborty<sup>1,\*</sup>, Navami Jain<sup>1,2</sup>, Ami S Bhatt<sup>1,2</sup>

4

5 1. Department of Genetics, Stanford University, Stanford, CA, USA.

6 2. Department of Medicine, Divisions of Hematology and Blood & Marrow

7 Transplantation, Stanford University, Stanford, CA, USA.

8 \* These authors contributed equally

9

10

11

12 **Abstract**

13

14 The human gut microbiome is a diverse ecosystem that encompasses multiple domains of life  
15 and plays a vital role in human health. Due to technical limitations, most microbiome studies have  
16 focused on gut prokaryotes, overlooking bacteriophages and other gut viruses. The most common  
17 method to profile viruses is to assemble shotgun metagenomic reads - often from virus-enriched  
18 samples - and identify viral genomes *de novo*. While valuable, this resource-intensive and  
19 reference-independent method has limited sensitivity. To overcome these drawbacks, we  
20 developed Phanta, which profiles human gut metagenomes in a virus-inclusive manner directly  
21 from short reads utilizing recently published catalogs of gut viral genomes. Phanta incorporates  
22 *k*-mer based classification tools and was developed with virus-specific properties in mind.  
23 Specifically, it includes optimizations considering viruses' small genome size, sequence  
24 homology with prokaryotes, and interactions with other members of the gut microbial community.  
25 Based on simulations, the workflow is fast and accurate with respect to both prokaryotes and  
26 viruses, minimizing false positive species identification using a novel genome coverage-based  
27 strategy. When applied to metagenomes from healthy adults, Phanta identified ~200 viral species  
28 per sample, ~5x more than the standard assembly-based methods. Notably, we observed a 2:1  
29 ratio between gut viruses and bacteria, with higher interindividual variability of the gut virome  
30 compared to the gut bacteriome. Phanta performs equally well on bulk vs. virus-enriched  
31 metagenomes, making it possible to study prokaryotes and viruses in a single experiment, with a  
32 single analysis. Phanta can tandemly profile gut viruses and prokaryotes in existing and novel  
33 datasets, and can therefore identify cross-domain interactions with likely relevance to human  
34 health. We expect that Phanta will reduce the barrier to virus-inclusive studies of the human gut  
35 microbiome, thus making it standard practice.

36

37

38

39

40

41

42

## 43 Introduction

44

45 The human gut microbiome is an ecosystem of diverse microorganisms including archaea,  
46 bacteria, viruses, and fungi. It plays a vital role in human health by interacting with our immune,  
47 digestive, and nervous systems<sup>1-4</sup>. Since the 1970s, tools such as 16S rRNA sequencing have  
48 enabled us to identify prokaryotic taxa present in the gut<sup>5</sup>, and therefore to determine crucial  
49 relationships between these taxa and human health, age, lifestyle, environment, geography, and  
50 demographics<sup>6-9</sup>. However, these fundamental techniques overlook the viral fraction of the  
51 microbiome, preventing us from evaluating the impact of the human gut virome on human health.

52

53 Shotgun metagenomics is a popular and affordable method to sequence metagenomic  
54 samples<sup>10-13</sup>. This method captures genomic DNA from all gut organisms, not only prokaryotes,  
55 making it an optimal tool to study DNA viruses of the virome<sup>14-16</sup>. In the past decade, thousands  
56 of human microbiome samples have been analyzed using this “domain-inclusive” method<sup>17-20</sup>.  
57 Human gut prokaryotes can be well-quantified from shotgun metagenomes through direct read  
58 classification by comparing sequencing reads to reference genomes<sup>18,19,21-24</sup>. However, in the  
59 absence of comprehensive catalogs of viral genomes, the most common method for profiling the  
60 virome from shotgun metagenomes has been to assemble sequencing reads into contigs and  
61 identify viral genomes *de novo*<sup>25,26</sup>. Assembly-based approaches overcome the fundamental  
62 limitation that, until recently, a majority of phages had no reference genome<sup>27</sup>. However, despite  
63 their strengths at *de novo* phage discovery, assembly-based approaches have limited ability to  
64 detect low-abundance phages, due to the relative difficulty of assembling the genomes of low  
65 abundance taxa<sup>28-30</sup>.

66

67 With increases in shotgun metagenomes from human gut samples, more comprehensive  
68 databases of gut viral genomes have recently been created<sup>27,31-37</sup>. By using these new  
69 compendiums, it is now possible to profile gut viruses and their prokaryotic hosts simultaneously  
70 through read-based, reference-dependent methods. This approach can address the sensitivity  
71 limitation of assembly-based methods to profile the virome, resulting in much more complete  
72 profiles of the gut microbiome with both prokaryotes and viruses accurately represented.

73

74 In this paper, we present Phanta, a fast and accurate virus-inclusive profiler of human gut  
75 metagenomes based on classification of short reads to our newly constructed, comprehensive  
76 database of human gut microbes. The provided database contains the latest genome catalogs  
77 from multiple domains of life, including more than 190,000 phage genomes and the entire HumGut  
78 collection of prokaryotic genomes<sup>19,27</sup>. Phanta incorporates the state-of-the-art tools Kraken2<sup>22</sup>  
79 and Bracken<sup>38</sup>, and complements them with additional filtering steps and optimizations specifically  
80 tailored to the challenges of gut viral quantification. Phanta accurately quantifies both bacteria  
81 and phage abundances in simulated mixed communities. In metagenomes from healthy human  
82 adults, Phanta identifies >100-fold more viral reads and minimizes unclassified reads when  
83 compared to the default Kraken2/Bracken databases and workflow. In addition, due to its high  
84 sensitivity, Phanta identifies 5-fold more viral species than a common workflow of contig assembly  
85 and viral sequence identification. Finally, Phanta quantifies just as many viruses when applied to  
86 bulk shotgun metagenomes vs. matched metagenomes enriched for virus-like particles. This

87 demonstrates that it is possible to profile multiple domains of life from a single metagenomic  
88 sequencing experiment, as opposed to needing an additional sequencing experiment after  
89 enrichment for virus-like particles. Taken together, we anticipate that Phanta, which is freely  
90 available at <https://github.com/bhattlab/phanta>, will facilitate improved profiling of cross-domain  
91 interactions in gut microbiomes.

92

## 93 **Results**

94

### 95 **Phanta: A workflow for phage-inclusive profiling of human gut metagenomes**

96 Phanta was developed to generate accurate and complete profiles of human gut metagenomes,  
97 with the goal of deepening our understanding of cross-domain interactions in the gut. To achieve  
98 this objective, we first constructed a comprehensive database of gut microbial genomes found in  
99 humans. To minimize false mapping, it was important to curate comprehensive collections of  
100 genomes from all groups of taxa residing in the human gut - not only phages and other viruses,  
101 but also prokaryotes, eukaryotes, and possible contaminants. For this purpose, we used the  
102 HumGut collection as a reference for both human gut bacteria and archaea<sup>19</sup>. HumGut includes  
103 dereplicated genomes from both UHGG and RefSeq. For viruses, we used the Metagenomic Gut  
104 Virus catalog (MGV; dominated by human gut phages)<sup>21,27</sup> and RefSeq. For gut eukaryotes, we  
105 also used RefSeq, and for contaminants, we used the human genome (hg38) and the Core  
106 UniVec database from NCBI<sup>22</sup>. To create an informative viral taxonomy, MGV genomes were first  
107 clustered to species-level operational taxonomic units (vOTUs). MGV vOTUs with high similarity  
108 to a RefSeq viral species were labeled with the NCBI-assigned taxonomy of that species. For the  
109 remaining MGV vOTUs, higher levels of taxonomy were assigned iteratively (see Methods).

110

111 The first step of Phanta is read classification to a database of reference genomes, such as that  
112 described above (Fig. 1A). As viruses have relatively low abundance in a typical metagenomic  
113 sample, we chose to use whole genome classification, which is typically more sensitive in the low-  
114 coverage regime than methods relying on clade-specific marker genes<sup>22,39</sup>. Specifically, Phanta  
115 classifies reads to the lowest possible taxonomic rank by Kraken2<sup>22,24</sup>, a *k*-mer-based method that  
116 has been shown to be both fast and accurate given the correct database and optimized  
117 parameters<sup>39</sup>. Second, Phanta reduces false positive species by filtering out species based on a  
118 calculated proxy for genome coverage (see Methods), a known issue in taxonomic classification<sup>40</sup>.  
119 Third, Phanta quantifies species-level relative abundances by executing Bracken, a tool  
120 complementary to Kraken2 that redistributes all classified reads to the species level using a  
121 Bayesian inference approach<sup>38</sup>. By default, Bracken calculates the “relative read abundance” -  
122 the proportion of reads assigned to a species out of all reads. However, since viral genomes can  
123 be orders of magnitude smaller than prokaryotic genomes, read abundance approaches inflate  
124 the relative signal from prokaryotes within a community. Therefore, we additionally calculate  
125 “relative taxonomic abundance”, which instead estimates the relative proportion of different  
126 organisms (not proportion of DNA sequence) within a given sample<sup>41</sup>. Briefly, we adjust the  
127 relative read abundance of each species using the median length of the species’ genomes. This  
128 provides a comparable abundance estimation to amplicon sequencing or marker gene-based  
129 approaches (Fig. 1B). Lastly, Phanta allows users to determine cross-domain relationships by

130 summing viral abundances by predicted host, providing information about the predicted virulence  
131 of the viral community, and correlating the abundances of phages and bacteria.

132

### 133 **Phanta accurately classifies short reads from simulated mixed microbial communities**

134 To evaluate the performance of Phanta, we simulated 10 mixed communities, each containing a  
135 total of ~6.5M 150 base pair (bp) paired-end reads from a combination of 300 prokaryotic  
136 genomes and 50 viral genomes (see Methods). The relative read abundance of prokaryotes and  
137 viruses in the resulting simulated samples was 0.95 and 0.05, respectively (Figure 2A). Phanta  
138 accurately assigned reads to the right domain with average read abundance of  $0.951 \pm 0.004$  mean  
139 read abundance for prokaryotes, and  $0.048 \pm 0.004$  mean read abundance for viruses (Figure 2B;  
140 Supplementary Data File 1).

141

142 We next used the simulated communities to test the accuracy of classification of reads by  
143 Kraken2. Reads were classified with high precision to all taxonomic ranks, with 63% of reads  
144 classified to the species level or lower (median across simulated communities; see Figure 2C).  
145 Next, we tested the accuracy of Phanta in estimating the abundance of each simulated species.  
146 Phanta's species-level estimates for relative read abundance were highly correlated with the true  
147 simulated values - Pearson's  $R=0.997$  for all species (including bacteria and archaea),  $R=0.998$   
148 for bacterial species (Figure 2D), and  $R=0.925$  for viral species (Figure 2E).

149

### 150 **Phanta's filtering step significantly reduces false positive species identification**

151 While developing Phanta, we observed that even a small fraction of mis-classified reads can lead  
152 to a non-negligible number of falsely identified species. Therefore, to increase the signal-to-noise  
153 of the identified species, we made the following modifications to the default Kraken2-Bracken  
154 workflow. First, we introduced a filtering step between Kraken2 and Bracken that estimates the  
155 breadth of genome coverage for species detected by Kraken2 and filters out likely false positive  
156 species based on a user-adjustable coverage threshold. In addition, for a read to be classified by  
157 Kraken2, we required that a certain fraction of a read's  $k$ -mers be mapped to a given taxon, in  
158 order for the read to receive that classification. To achieve this, we adjusted Kraken2's confidence  
159 threshold. By default, Phanta uses a confidence threshold of 0.1 (vs. 0 for default Kraken2; also  
160 recommended by <sup>39</sup>), and this can be further adjusted by the user. These steps reduced false  
161 positive species by 50-fold with minimal reduction of true positive species relative to a consecutive  
162 run of Kraken2 and Bracken using default parameters (Figures 2F-G). Overall, we demonstrated  
163 that Phanta performs with high accuracy in both classifying reads and estimating abundance while  
164 substantially reducing false species identification.

165

### 166 **Masking prophages in prokaryotic genomes further increases sensitivity to viral reads**

167 Due to genetic flow between viruses and their hosts, phage genomes share a relatively high  
168 proportion of their genome with their bacterial hosts (Supplementary Fig. 1A). This can limit  
169 detection of viral sequences in metagenomes, because portions of the viral sequences will also  
170 be present in bacterial genomes. Therefore, we decided to construct an alternative version of  
171 Phanta's default database, in which prophage sequences, which are phage sequences that are  
172 integrated into the bacterial chromosome, are "masked". This is accomplished by replacing the  
173 prophage sequences with Ns in all bacterial genomes where they appear. Prophage sequences

174 were predicted using VIBRANT<sup>42</sup>. We anticipated that masking would further increase Phanta's  
175 sensitivity to viral reads in simulated communities. Indeed, using the masked database reduced  
176 the number of "ambiguous" read classifications - i.e., the number of reads that Kraken2 classified  
177 to the "root" of the taxonomy tree. The vast majority of reads that were classified to the root using  
178 the default database, but received a new classification after masking, were reclassified to the viral  
179 domain (Supplementary Fig. 1B). This result demonstrates that: (1) shared sequences between  
180 bacteria and viruses can indeed result in ambiguous read classification, and (2) this ambiguity  
181 can be partially resolved by masking prophages in bacterial genomes. Importantly, masking does  
182 not lead to over-detection of viruses; Phanta's final read abundance estimate for viruses remained  
183 highly accurate (Supplementary Fig. 1C).

184

### 185 **Phanta improves the overall proportion of reads classified in shotgun metagenomes from** 186 **healthy adults**

187 Given the good performance of Phanta on simulated samples, we wished to assess whether  
188 Phanta could improve viral identification in samples from healthy adults. We applied Phanta with  
189 the default (no prophage masking) database on human gut metagenomes sampled from 245  
190 healthy adults (age range 21-79, from Yachida *et al.*)<sup>43</sup>. In total, across 245 samples, the workflow  
191 took ~60 minutes to run using 1 core, 16 threads, and 32GB memory. Given that Phanta  
192 incorporates Kraken2 and Bracken, we were easily able to compare the workflow's performance  
193 using Phanta's default database, compared to existing Kraken2/Bracken-compatible databases.  
194 In particular, we compared against four existing databases (Table 1): the standard Kraken2  
195 database<sup>22,44</sup> (May 2021), the Unified Human Gastrointestinal Genome (UHGG) collection<sup>18</sup> (July  
196 2021), RefSeq Complete<sup>39</sup> (April 2022), and HumGut<sup>19</sup> (July 2021). Phanta's default database  
197 was able to minimize the number of unclassified reads to 2% (Fig. 3A), and notably, it requires  
198 ~97% less disk space than the most comprehensive database tested, RefSeq Complete (32GB  
199 for Phanta, 1.2 TB for RefSeq Complete<sup>39</sup>).

200

### 201 **Phanta substantially increases viral identification in shotgun metagenomes**

202 In addition to maximizing classified reads, Phanta's default database led to the highest level of  
203 viral identification, detecting 25-fold and 188-fold more viral sequences compared to RefSeq  
204 Complete and the standard Kraken2 database, respectively (Fig. 3B; Supplementary Data File  
205 2). Using Phanta, we now estimate that viral DNA constitutes 3-5% of the DNA in the human gut.  
206 Taken together, Phanta improves read classification both by enabling the classification of  
207 previously unclassified reads and by improving the recognition of viral sequences.

208

### 209 **Phanta outperforms standard assembly-based methods in identifying viruses in shotgun** 210 **metagenomes**

211 A current gold-standard workflow commonly used to identify viruses in shotgun metagenomes  
212 involves assembling reads into contigs and labeling the likely viral contigs<sup>42,45-49</sup>. To compare  
213 Phanta to this gold standard, we randomly selected 50 metagenomes from the healthy adult  
214 cohort and ran a standard assembly workflow. In short, reads were assembled to contigs using  
215 metaSPAdes<sup>50</sup>, short/low-quality contigs were filtered using CheckV<sup>51</sup>, and viral contigs were  
216 identified using both VIBRANT<sup>42</sup> and VirSorter<sup>45</sup>. For each sample, the total set of viral contigs  
217 from both methods was de-replicated to 95% ANI to calculate a number of viral species. Phanta

218 was able to identify a higher number of viral species than the assembly workflow in all samples,  
219 with a median of 190 (IQR: 149-252) viral species per sample relative to 35 (IQR: 25-42) (Fig. 3C)  
220 identified with assembly-based approaches. Of note, the vast majority of viral contigs predicted  
221 by assembly were highly similar to genomes in the viral portion of Phanta's database  
222 (Supplementary Fig. 2).

223

### 224 **There are twice as many viral as bacterial genomes in the human gut**

225 By default, Bracken calculates relative read abundance for each identified taxon - i.e., the fraction  
226 of reads classified to it. This measurement serves as an estimation of the fraction of genomic  
227 DNA belonging to each taxon, out of the total DNA in a sample. While this measurement is highly  
228 valuable, an ecological perspective of a community requires understanding the proportions of  
229 "individuals" in the community - i.e., relative taxonomic abundance<sup>41</sup>. Relative read abundance is  
230 typically similar to taxonomic abundance in communities with similar genome lengths. However,  
231 in mixed communities containing taxa with orders of magnitude differences in genome length, like  
232 bacteria and viruses, relative read abundance is biased towards taxa with longer genomes (as  
233 illustrated in Fig. 1B). Hence, Phanta calculates an estimation of relative taxonomic abundance  
234 by correcting the relative read abundance by genome length. Using our relative taxonomic  
235 abundance calculation, we estimate the ratio between copies of viral genomes to bacterial  
236 genomes in the human gut to be ~2:1 (Figs. 4A-B; Supplementary Data File 2). Phanta also  
237 reports several other normalizations - reads per million base pairs, reads per million reads, reads  
238 per million base pairs per million reads (analogous to RPKM in transcriptomics) and genome  
239 copies per million reads.

240

### 241 **High individuality of the human gut virome**

242 We further used the viral and bacterial profiles reported by Phanta to describe core differences  
243 between the virome and bacteriome of healthy adults. We observed a higher between-sample  
244 dissimilarity of the virome relative to the bacteriome in healthy adults (Fig. 4C). The high  
245 dissimilarity of the virome between individuals points to a highly personalized virome, as has been  
246 suggested previously<sup>31,52-54</sup>. Consistent with this result, individual viral species are skewed  
247 towards lower prevalence than bacterial species (Fig. 4D). However, a number of lowly prevalent  
248 viruses show high mean abundance across individuals, indicating that they are highly abundant  
249 when present. As previously suggested, the prototypical crAssphage<sup>55,56</sup> (RefSeq ID 1211417)  
250 was one of the most abundant viral species, although it was not among the most prevalent (Fig.  
251 4D and Supplementary Table 1). Two of the most prevalent and abundant species were OTU-  
252 66229 and OTU-72541. These phages are highly similar to the recently described *Bacteroides*  
253 phages LoVEphage<sup>37</sup> and Hankyphage (p00)<sup>57</sup>, respectively (Supplementary Fig. 3). The most  
254 abundant and prevalent phage detected was Caudovirales OTU-21255, a temperate phage likely  
255 of family Siphoviridae whose presumed host is *Bacteroides uniformis*. This species was found in  
256 232/245 (95%) of individuals in this cohort of healthy adults, and comprises 1512 genomes in  
257 Phanta's default database.

258

### 259 **Prevalent phages infect *Bacteroides***

260 We next examined relationships between viral species prevalence and predicted host.  
261 *Bacteroides* is the most commonly predicted host genus for viral species detected in the healthy

262 adult cohort. Specifically, it was the predicted host for 6.5% of detected viral species, compared  
263 with 3% of species in Phanta's database, more than twice than expected. The dominance of  
264 Bacteroides as a predicted host further increases among the more prevalent viral species (Fig.  
265 4E).

266

### 267 **Temperate phages dominate the human gut phageome**

268 Phanta's default database includes estimates of virulence per species (see Methods), which we  
269 used to determine the ratio between different phage lifestyles (virulent vs. temperate) in the  
270 human gut. We observed that in the vast majority of samples temperate phages are dominant  
271 with a median of 0.54 for the ratio of virulent/temperate species identified, and 0.55 for the  
272 corresponding abundance ratio. Notably, more prevalent phages are skewed towards the  
273 temperate lifestyle (Supplementary Fig. 4), potentially reflecting the ability of some temperate  
274 phages to remain dormant in their hosts. Interestingly, the abundance of virulent phages in the  
275 community, relative to temperate phages, is positively correlated with overall phage abundance  
276 in the microbiome (Fig. 4F). This is consistent with the nature of virulent phages, whose active  
277 replication increases their ratio relative to their bacterial host.

278

### 279 **Phanta performs well on virus-enriched metagenomes**

280 Viral enrichment, either through filtration or other approaches to achieve viral particle isolation, is  
281 commonly used in viromics studies to enhance the detection of viral DNA in metagenomes<sup>58</sup>.  
282 Therefore, we wanted to test Phanta's performance in metagenomes originating from virus-  
283 enriched samples. We applied Phanta to paired bulk and virus-enriched shotgun metagenomes  
284 from infants (Supplementary Data Files 3-6; source data: Liang *et al.*<sup>59</sup>). We first tested the  
285 performance of Phanta on the virus-enriched samples by correlating the viral-like particle counts  
286 (from Supplementary Table 2 in <sup>59</sup>) to the number of viral species identified (i.e., viral species  
287 richness) by various assembly or classification methods. Phanta-based richness was the most  
288 strongly correlated with VLP counts (Fig. 5A).

289

### 290 **Viral profiles from bulk and virus-enriched metagenomes overlap, but complement each 291 other**

292 Given its high sensitivity, we hypothesized that Phanta would detect a comparable number of viral  
293 species in bulk metagenomes as in virus-enriched metagenomes. Indeed, the number of species  
294 detected was similar in paired bulk and virus-enriched metagenomes (Fig. 5B). We further tested  
295 whether the bulk and viral-enriched metagenomes provide a similar profile of the viral community  
296 by examining pairs of bulk and viral-enriched metagenomes from the same sample. First, we  
297 examined 10 pairs of metagenomes with relatively deep sequencing of the bulk metagenomes  
298 (range of 150bp paired-end reads 8.6M - 13.3M; median = 9.3M). Species present in bulk  
299 metagenomes captured a median of 94% of the viral abundance in virus-enriched metagenomes  
300 (Fig. 5C). The variance in this quantity is mostly explained by the sequencing depth of the bulk  
301 metagenomes (Supplementary Fig. 5). To complement this analysis, we examined 10 pairs of  
302 metagenomes with highly successful viral enrichment (see Methods). Species present in virus-  
303 enriched metagenomes captured a median of 69% of the viral abundance in bulk metagenomes  
304 (Fig. 5D). Those differences are expected as shotgun metagenomes can capture viruses that did  
305 not enrich in the VLP enrichment process for a variety of reasons, technical or biological<sup>31</sup>. For

306 example, prophages lack viral-like particles, and are therefore more likely to be captured by bulk  
307 metagenomes. Given the inclusive nature of bulk metagenomes, they capture more viral species  
308 per total number of viral reads (Supplementary Fig. 6A), whereas viral-enriched metagenomes  
309 capture more viral species per total number of metagenome reads (Supplementary Fig. 6B). With  
310 the ability to identify prophages in bulk metagenomes, we hypothesized that the fraction of  
311 temperate phages would be higher in virus-enriched metagenomes. Indeed, we observed a 3-fold  
312 higher virulent/temperate abundance ratio in virus-enriched metagenomes relative to bulk (Fig.  
313 5E; Supplementary Fig. 6C).

314

### 315 **Phanta is highly effective for simultaneous quantification of phages and their hosts from** 316 **a single metagenomics experiment**

317 One advantage of using Phanta to profile bulk metagenomes, as opposed to virus-enriched  
318 metagenomes, is the ability to examine phages and their hosts simultaneously and from a single  
319 dataset, instead of two separately generated datasets. Using a Phanta-based analysis of the bulk  
320 metagenomic dataset from Liang *et al.*<sup>59</sup> investigating the impact of diet on the infant gut, we found  
321 that *Bifidobacterium* and its phages are ~2-fold more abundant in breastfed infants relative to  
322 formula-fed or infants that were fed with a mixed breast milk and formula diet (Fig. 5F). This  
323 observation, although expected, demonstrates the power of Phanta to simultaneously identify  
324 phages and their bacterial hosts and to associate them with known traits.

325

### 326 **Phanta accurately identifies and quantifies human-infecting viruses**

327 Lastly, we wished to test the ability of Phanta to accurately identify human-infecting viruses in  
328 metagenomes. Liang *et al.* were able to identify viruses in the family of Adenoviridae using qPCR  
329 from their infant stool samples<sup>59</sup>. Phanta identified 5 samples with the mastadenovirus C species,  
330 with almost perfect correlation between the estimation of genome copies per uL using qPCR and  
331 Phanta's estimation of genome copies per million reads (Fig. 5G). Phanta was able to identify  
332 Adenoviruses in bulk shotgun metagenomic samples with as low as 88 copies/uL in qPCR and  
333 successfully identified all samples with >550 copies/uL. Phanta demonstrated higher sensitivity  
334 in identifying Adenoviruses relative to using assembly-based methods (Fig. 5H), which only  
335 detected Adenoviruses in samples that had >20,000 copies/uL by qPCR. Of note, we used the  
336 assembled contigs to confirm that Phanta successfully identified the right Adenovirus species, by  
337 aligning the contigs to all Adenovirus genomes from RefSeq.

338

## 339 **Discussion**

340

341 A major goal of microbiome studies is to identify microbial features associated with traits of  
342 interest, such as phenotypes, lifestyle factors, and health status. In an ideal world, organisms  
343 from all domains could be accurately quantified in a single experiment. The first step in achieving  
344 this goal is to profile microbial communities - i.e., to determine their composition from sequencing  
345 data. Although shotgun metagenomes capture both prokaryotes and viruses, profiling the viral  
346 fraction of microbial communities has historically presented a greater challenge and has required  
347 specially tailored methods. For example, popular reference-based methods have allowed  
348 accurate profiling of prokaryotes from metagenomes<sup>24</sup> without being able to accurately capture  
349 viruses due to the historical lack of comprehensive reference databases of viral genomes<sup>27</sup>.



350 Because of these limitations, profiling viruses has required additional orthogonal analyses, based  
351 on assembling metagenomic reads and identifying viral genomes *de novo*<sup>25,26</sup>. In addition, due to  
352 the relatively low abundance of viral sequences in bulk metagenomes, it has been common to  
353 conduct an entirely separate experiment to profile the virome by enriching for viral sequences  
354 prior to making sequencing libraries<sup>58</sup>.

355  
356 With the recent development of much more comprehensive databases of viral genomes<sup>27,31-34</sup>,  
357 deeply sequenced bulk metagenomes, and fast and accurate read classifiers<sup>22,38</sup>, technical and  
358 experimental advances have converged to make it possible to integrate prokaryotic and viral  
359 profiling. By harnessing the latest developments, Phanta enables simultaneous profiling of  
360 bacteriophages and their prokaryotic hosts, in a single experiment and with a single analysis. This  
361 simultaneous profiling has several advantages. First, it reduces the need to sequence both viral-  
362 enriched and bulk metagenomes, thus reducing research time and costs, in addition to eliminating  
363 technical differences between two separate experiments. Second, it bypasses the need to use  
364 separate computational workflows to profile prokaryotes and viruses. Lastly, and most  
365 importantly, it allows the study of cross-domain interactions between phages and their hosts,  
366 either in novel datasets, or in the wealth of metagenomic datasets that are already publicly  
367 available.

368  
369 Although Phanta can be applied with different databases, Phanta's default database was  
370 constructed with the human gut in mind. For decades, the viral portion of the human gut was  
371 mostly unknown, and considered as "dark matter"<sup>60,61</sup>. There is still much to learn, with some basic  
372 discoveries occurring only in the past few years. For example, the first representative of one of  
373 the most abundant bacteriophage clades - crAss-like viruses - was discovered only in 2014<sup>56</sup>.  
374 Similar examples, such as the highly prevalent Hankyphage (p00)<sup>57</sup> and LoVEphage<sup>37</sup>, were  
375 discovered only in 2018 and 2021, respectively. We anticipate that Phanta, when applied with its  
376 default database, will allow similar key discoveries to be made. In this study alone, we were able  
377 to estimate a ~2:1 ratio of viruses to bacteria in the human gut, determine that temperate and  
378 Bacteroides-infecting phages dominate the gut phageome, and demonstrate a high interindividual  
379 variability of the gut virome, as compared to the bacteriome. These and other core principles can  
380 serve as a springboard for more extensive discovery, such that "gut microbiome" will no longer  
381 be publicly synonymous with "gut bacteria," but rather understood as a complex community with  
382 many types of interacting members.

383  
384 Importantly, Phanta was developed with careful attention to the risk of spurious discovery, as  
385 read-based classifiers are frequently known to make mistakes, and thus to identify false positive  
386 taxa<sup>40</sup>. As described, to mitigate false classification we increase classification confidence and filter  
387 out species with low genome coverage, an idea that was previously described in the  
388 implementation of KrakenUniq<sup>40</sup>. Of course, these decisions come with potential costs. For  
389 example, increasing the required confidence of classification may lead reads from some species  
390 to all classify at higher taxonomic ranks during the Kraken2 step of the workflow. In such a  
391 scenario, the sensitivity of viral identification would be decreased, since during Bracken, classified  
392 reads are only redistributed to species that initially received some direct classifications. Similarly,  
393 requiring a certain genome coverage reduces the probability of identifying lowly abundant species

394 with long genomes. However, all the relevant parameters of Phanta are user-adjustable, and  
395 using our simulations we were able to show that a combination of minor increments in both  
396 thresholds is sufficient to reduce most of the noise with a very small cost to signal (Figs. 2D-E).

397  
398 More broadly, Phanta offers a flexible setup that can be modified according to the user's analysis  
399 goals and main concerns. If a user aims to minimize false negatives, i.e. to increase the probability  
400 of identifying all species while allowing a substantial increase in false positives, the user can  
401 decrease (1) the confidence cutoff, (2) the coverage requirement, and (3) the minimal number of  
402 reads directly classified to a species for it to receive an abundance estimate. On the other hand,  
403 if a user wishes to minimize false positives while taking the risk of decreasing true positives, the  
404 user can increase these three parameters. Phanta also provides an alternative database to the  
405 default, in which predicted prophages in the HumGut genomes were masked. This masked  
406 database can be used to increase the likelihood of identifying prophages. In addition to  
407 parameters and database choice, the characteristics of a sequencing experiment can impact the  
408 power of identification by Phanta. Although we did find high agreement between viral-enriched  
409 and bulk shotgun metagenomes (Fig. 5C), enriching the library for viral particles would be  
410 recommended if a researcher (i) prioritizes identification of viruses that are particles over  
411 prophages, (ii) is not focused on determining cross-domain interactions, and (iii) is limited by the  
412 possible depth of metagenomic sequencing. Conversely, bulk metagenomic analysis allows users  
413 to: (i) profile prophages in addition to virulent phages, (ii) avoid potential biases introduced by the  
414 process of isolating viral particles, and (iii) identify cross-domain interactions, both within and  
415 across samples. Given the low and rapidly decreasing costs of shotgun sequencing, and our  
416 findings that bulk metagenomes of fairly standard depth allow for comparable virus identification  
417 to viral particle-enriched fractions, we anticipate that many researchers may opt to enhance their  
418 standard analyses of bulk metagenomes by applying Phanta.

419  
420 While Phanta enhances the knowledge that can be gained about viruses from bulk metagenomes,  
421 it has several limitations. First, while Phanta has high sensitivity, using a reference-based method  
422 restricts identifications to the genomes in the database, and thus limits resolution. For example,  
423 Phanta's default database is biased toward dsDNA viruses identified in the human gut. Similarly,  
424 while Phanta does include some eukaryotes in its default database, our knowledge of this domain  
425 in the gut is still limited; this is, in part, due to limitations in reference databases for protists,  
426 amoeba, helminths and fungi. Improvements in eukaryotic reference databases should enhance  
427 eukaryote classification in the coming years. Second, extending Phanta to characterize the virome  
428 in other human microbiomes, such as the skin or vaginal microbiome, may require curation of  
429 additional metagenome-derived virome databases generated from these niches. Furthermore,  
430 classifying short reads to reference genomes is challenging when reads originate from genomic  
431 regions that are conserved between species. Moreover, the usage of *k*-mer-based methods,  
432 although fast and computationally efficient, does not provide information required for aligning  
433 reads to a specific region in the genome, and thus does not allow investigation of genome  
434 variation. Finally, viral taxonomy is not as well-defined as prokaryotic taxonomy, and thus Phanta  
435 cannot currently provide specific named designations to many viral species, beyond family- or  
436 order-level assignments. We anticipate that as knowledge of the virome increases, this challenge  
437 will begin to be addressed.

438  
439  
440  
441  
442  
443  
444  
445  
446  
447  
448  
449  
450  
451

Despite these limitations, Phanta is benchmarked, easy to use, carefully tuned to limit false positives, and able to provide simultaneous profiling of various domains from a single experiment. These advantages suggest that Phanta will help accelerate the study of the virome in human gut microbiomes, as well as illuminate cross-domain interactions in this niche. Phanta enables much higher resolution of the viral portion in a human gut sample when analyzing a bulk metagenome relative to current approaches or databases, and thus it promises to provide exciting insights when applied to the tens of thousands of human gut metagenomes that have already been sequenced, to date. We expect that Phanta will be both: (1) used to re-analyze publicly available data, and (2) taken into account when planning new experiments. Overall, Phanta lowers the barrier to virus-inclusive studies of the gut microbiome, and we expect that its application will confidently identify numerous novel associations between viruses, prokaryotes, and human traits.

## 452 **Online Methods**

453

### 454 **Constructing a comprehensive, taxonomy-aware, domain-inclusive database of human gut** 455 **microbes**

456

457 Phanta's default database was constructed to be compatible with the Kraken2/Bracken tools<sup>22,38</sup>.  
458 Therefore, its construction required curating: 1) a large collection of genomes, and 2) taxonomy  
459 files placing each genome within a tree of named nodes.

460

461 The viral genomes within the database were sourced from: 1) the recently published human gut-  
462 focused MGV catalog (available at (<https://portal.nersc.gov/MGV/>)<sup>27</sup> and 2) RefSeq<sup>21</sup>, the  
463 database of reference genomes maintained by NCBI (MM/YY of download: 02/22).

464

465 After downloading the viral genomes, the viral taxonomy tree was constructed. The first step was  
466 to download the complete NCBI taxonomy using the kraken2-build --download-taxonomy utility.  
467 Next, branches of the taxonomy were pruned so that only the branches leading to the RefSeq  
468 viral genomes remained.

469

470 After providing taxonomic assignments to RefSeq genomes, assignments were provided to the  
471 MGV genomes. The first step in doing so was to group the MGV genomes into the 54,118 ANI-  
472 based species specified by the MGV paper<sup>27</sup>. Each of these species came with a designated  
473 "species representative genome" that was chosen based on features such as circularity and  
474 length. Code on the MGV GitHub page  
475 ([https://github.com/snayfach/MGV/tree/master/aa\\_i\\_cluster](https://github.com/snayfach/MGV/tree/master/aa_i_cluster)) was then used to cluster species into  
476 genera based on amino acid identity (AAI) and gene sharing between the representative  
477 genomes.

478

479 To avoid species duplications between MGV and RefSeq viruses, and to provide a full NCBI  
480 taxonomy for MGV genomes where available, average nucleotide identity was calculated between  
481 all of the 54,118 species representative genomes in MGV and all the RefSeq viral genomes using  
482 fastANI<sup>62</sup>. In cases where an MGV species representative genome had > 95% ANI to a RefSeq  
483 viral genome, all of the genomes in the relevant MGV species were re-assigned to RefSeq, i.e.,  
484 designated as strains of the RefSeq viral genome.

485

486 To determine where each AAI-based MGV genus fit into the NCBI taxonomy, we utilized a file  
487 from the MGV website (<https://portal.nersc.gov/MGV/>) that provides - when possible - NCBI-  
488 recognized taxonomic annotations for each genome at the genus, family, and/or order levels,  
489 based on amino acid alignments to a protein database<sup>27</sup>. We used this information to remove  
490 some of the AAI-based genera and re-assign their contained species to the relevant NCBI-  
491 recognized genus. Specifically, for each AAI-based genus, we calculated the percentage of  
492 species representative genomes within the genus that had an NCBI genus annotation provided.  
493 If this percentage was greater than 50%, and the NCBI genus annotation was consistent for >  
494 90% of the species representative genomes with annotations, the AAI-based genus was removed  
495 and all of its species were re-assigned to the NCBI genus.

496

497 The remaining AAI-based genera were then assigned as direct descendants of the lowest  
498 possible NCBI-recognized taxonomic level, by iterating a variant of the strategy described above.  
499 More specifically, starting with family: if > 50% of the species representative genomes within a  
500 given AAI-based genus had an NCBI family annotation, and the NCBI family annotation was  
501 consistent for > 90% of the species representative genomes with annotations, the AAI-based  
502 genus was assigned as a direct descendant of the relevant NCBI family. The remaining AAI-  
503 based genera (i.e., those without a family assignment) were then assigned to an order - when  
504 possible - in the same manner. All of the AAI-based genera without an order assignment were  
505 assigned as direct descendants of the superkingdom of Viruses.

506

507 The prokaryotic genomes within Phanta's database were sourced from HumGut, a recently  
508 published human gut-focused catalog of prevalent bacterial and archaeal genomes<sup>19</sup>. The  
509 HumGut catalog was in turn sourced from both the Unified Human Gastrointestinal Genome  
510 (UHGG) collection<sup>18</sup> and RefSeq<sup>21</sup>. An NCBI-compatible taxonomy file for the HumGut genomes  
511 was downloaded directly from the HumGut website (<http://arken.nmbu.no/~larssn/humgut/>). The  
512 branches of the NCBI taxonomy leading to the human genome were also included in this  
513 taxonomy file and thus we also included the human genome (hg38) in our database.

514

515 We sourced fungal genomes from RefSeq and common contaminant sequences from the Core  
516 UniVec database using the `kraken2-build download-library` command provided by the Kraken2  
517 developers (MM/YY of download: 02/22). The relevant branches of the NCBI taxonomy were then  
518 obtained in the same way that they were obtained for the RefSeq viral genomes (i.e., by "pruning"  
519 the full NCBI taxonomy, please see above).

520

521 Finally, the constructed taxonomy files for each portion of the database were concatenated, and  
522 a Kraken2/Bracken-compatible database was built using the commands provided on the Github  
523 sites (<https://github.com/DerrickWood/kraken2>; <https://github.com/jenniferlu717/Bracken>).

524

### 525 **Masking prophages in prokaryotic genomes**

526

527 An alternative version of Phanta's default database was also created, in which predicted  
528 prophages were masked (i.e., replaced with Ns) within all the prokaryotic genomes from HumGut.  
529 VIBRANT (v1.2.1)<sup>42</sup> was used to predict prophages within the HumGut genomes. Prophage  
530 coordinates were extracted and masking was conducted using the `bedtools` utility  
531 `MaskFastaFromBed`<sup>63</sup>. All of the analyses in this paper were conducted using the unmasked  
532 version of the database, except where explicitly noted otherwise.

533

### 534 **Workflow implementation**

535

536 Phanta was implemented using the workflow management system Snakemake. Core scripts are  
537 written in Python, bash, and R. A step-by-step tutorial detailing workflow installation and usage is  
538 provided on the main page of the Phanta GitHub (<https://github.com/bhattlab/phanta>). Briefly,  
539 after cloning the GitHub repository to their system, users should: 1) download the desired

540 database - default (unmasked) or masked - via the command line, 2) make slight edits to a  
541 configuration file, and 3) execute the provided Snakemake command on the command line, within  
542 the appropriate conda environment that is fully specified in a provided yaml file. As detailed in the  
543 GitHub tutorial, the repository also provides a test data set that can be used to verify that the  
544 workflow was installed correctly.

545

## 546 **Classification of metagenomic reads to taxa**

547

548 The first step of the Phanta workflow is classification of metagenomic reads in each sample  
549 against the desired database of genomes (default/unmasked or masked, see above).  
550 Classification is conducted using the Kraken2 tool (currently v2.1.2)<sup>22</sup>, which classifies reads  
551 using a *k*-mer-based approach. More specifically, to classify each read, Kraken2 slides along the  
552 read length, computes a “minimizer” (i.e., compact version) of each *k*-mer, and looks up where  
553 the minimizer maps in the genome database. After all the minimizers in the read have been looked  
554 up, Kraken2 classifies the read to the lowest taxonomic level possible, considering the user’s  
555 preference for the confidence in the assignment (supplied via the --confidence parameter to  
556 Kraken2). By default, Phanta supplies a confidence of 0.1 to Kraken2, but this value can be  
557 adjusted by the user in the Snakemake configuration file. This parameter ranges from 0 to 1 and  
558 essentially specifies a certain fraction of a read’s *k*-mers to be mapped to a given taxon, in order  
559 for Kraken2 to make that classification. E.g., 0.1 = 10%.

560

561 Phanta also makes use of the --report-minimizer-data parameter available in Kraken2 v2.1.2, that  
562 is based on ideas from KrakenUniq<sup>40</sup>. Providing this parameter modifies the standard Kraken2  
563 output to report an additional data point for each taxon, specifically: how many unique minimizers  
564 in the genomes of this taxon are covered by read sequences?

565

## 566 **Filtering of false positive species after classification**

567

568 Phanta filters likely false positive species from each sample after the initial classification step and  
569 before species-level abundance estimates are calculated (Figure 1). This filtering step makes use  
570 of the minimizer data reported by Kraken2 during the classification step (described above, in the  
571 section “Classification of metagenomic reads to taxa”).

572

573 Specifically, a proxy for genome coverage is calculated for each genome of each species  
574 identified during classification. This proxy is calculated by dividing: 1) the reported number of  
575 unique minimizers in the genome that are covered by read sequences, by 2) the total number of  
576 unique minimizers contained in the genome. The denominator of this fraction is not reported in  
577 the Kraken2 output, but is obtained by Phanta from an “inspect.out” file contained within the  
578 genome database (originally generated using the kraken2-inspect functionality).

579

580 Bacterial and viral species are marked as false positives and filtered out if none of their strain-  
581 level genomes have a calculated coverage above a user-specified threshold. Suggested  
582 thresholds are provided in the Snakemake configuration file (0.01 for bacterial species; 0.1 for  
583 viral species). These suggested thresholds were chosen because they yielded a high signal-to-

584 noise ratio in identified species when tested on the mixed simulated metagenomes described  
585 below.

586

587 Users can also require that the numerator of the fraction above (i.e., the number of unique  
588 minimizers covered by reads) be higher than a specified threshold for at least one strain-level  
589 genome of each “true positive” species. In other words, it is possible to specify that a high  
590 calculated genome coverage will not “count” unless the number of unique minimizers is higher  
591 than a specific value (e.g., > 300 unique minimizers) for at least one strain-level genome. By  
592 default, this option is not utilized by Phanta but can be implemented by the user by making use  
593 of the `minimizer_thresh_viral` and `minimizer_thresh_bacterial` parameters in the Snakemake  
594 configuration file.

595

### 596 **Species abundance estimation and correction for genome length**

597

598 After species are filtered from the Kraken2 output, abundances of the remaining species are  
599 estimated using the Kraken2-compatible tool Bracken (currently v2.7)<sup>38</sup>. Bracken estimates  
600 species-level abundances by redistributing all classified reads to the species level.

601

602 Of note, Bracken accepts a threshold parameter that specifies one last filter for false positive  
603 species - how many sample reads must have been classified to a species during Kraken2  
604 classification for Bracken to estimate its abundance? By default, Phanta specifies this threshold  
605 as 10 reads - the accepted standard for running Bracken - but this number can be adjusted by  
606 the user through the `filter_thresh` argument in the Snakemake configuration file.

607

608 We also utilize Bracken output to calculate relative taxonomic abundance estimates for each  
609 species by considering genome length. Specifically, the abundance estimate for each species is  
610 scaled by the median length of the genomes under the species. Additional normalizations are  
611 also provided in this corrected output file, such as reads per million reads per million base pairs  
612 (analogous to RPKM in transcriptomics), copies per million reads, and more.

613

### 614 **Provided post-processing scripts**

615

616 There are three main post-processing scripts in the Phanta GitHub.

617

618 The first calculates “lifestyle statistics” for the viral community in each metagenome (e.g., ratio of  
619 virulent:temperate viruses), based on lifestyle predictions for viral species that are provided in  
620 Phanta’s default database. Lifestyle predictions for species from MGV were obtained from the  
621 `mgv_contig_info` file provided in the MGV database<sup>27</sup>. These predictions were calculated using  
622 BACPHLIP<sup>64</sup> and we used the same tool (v0.9.6) to make lifestyle predictions for viral species  
623 from RefSeq. Throughout the manuscript, viruses with a BACPHLIP-predicted virulence score  
624 above 0.5 were considered virulent; others were considered temperate.

625

626 The second collapses viral abundances in each sample by predicted host, based on provided  
627 host predictions for viral species in Phanta's default database. Host predictions were made using  
628 iPHoP<sup>65</sup>.

629  
630 The third correlates the abundances of bacterial and viral species in each sample. This cross-  
631 kingdom correlation is done by fastspar<sup>66,67</sup> - a method designed to correlate compositional data.

632  
633 Also provided are post-processing scripts to filter or sum abundance tables (counts, relative read  
634 abundances, or relative taxonomic abundances) to a desired taxonomic rank (e.g., species or  
635 genus).

636

### 637 **Simulating mixed metagenomes**

638

639 10 mixed metagenomes (each containing ~6.5M paired-end 150bp reads) were simulated using  
640 CAMISIM (v1.3)<sup>68</sup>. These simulated metagenomes were used to generate the data in Figure 2.  
641 Each simulated metagenome consisted of: 1) 95% prokaryotic reads from 300 randomly chosen  
642 genomes from the HumGut catalog, and 2) 5% viral reads from 50 randomly chosen genomes  
643 from the MGV catalog.

644

### 645 **Download and processing of publicly available, short-read human gut metagenomes**

646

647 245 shotgun gut metagenomes from healthy human adults in a Japanese cohort were  
648 downloaded from SRA (accession DRP004793 - Yachida *et al.*<sup>43</sup>). Shotgun gut metagenomes  
649 from infants were also downloaded from SRA (accession PRJNA524703 - Liang *et al.*<sup>59</sup>). The full  
650 list of downloaded samples, along with accession numbers, is available within Supplementary  
651 Table 2.

652

653 Following download, each metagenome was preprocessed as follows. First, reads that exactly  
654 matched each other (PCR duplicates) were removed using hts\_SuperDeduper (v1.2.0). Next,  
655 TrimGalore (v0.6.5 healthy adults; v0.6.7 infants) was used to: 1) trim low-quality bases (Phred  
656 score < 30) from the ends of reads, and 2) discard reads with a final length of < 60bp. Human  
657 reads were then removed using BWA alignment against the human genome (GRCh37). Initial  
658 and final quality checks were performed using MultiQC (v1.7 healthy adults; v1.11 infants).

659

660 All results from applying Phanta to these metagenomes were obtained using Phanta's default  
661 database and parameters, except where explicitly noted otherwise (i.e., varied databases were  
662 tested in Figures 3A and 3B). Note also that for the infant cohort, the database file required for  
663 running Bracken was slightly modified from default (adjusted for 120bp reads rather than 150bp,  
664 following the instructions on the Bracken GitHub).

665

666 Separate from running Phanta, a subset of these metagenomes was assembled into contigs and  
667 scaffolds using metaSPADES<sup>50</sup> version 3.15. Specifically, the following metagenomes were  
668 assembled: 1) fifty randomly selected metagenomes from the healthy adult cohort, and 2) all bulk



669 metagenomes from the “four-month” subgroup of the infant cohort. The specific metagenomes  
670 that were successfully assembled are indicated in Supplementary Table 2.

671

### 672 **Assembly-based method for identifying viral species in healthy adult gut metagenomes**

673

674 To generate the results in Fig. 3C, the 50 assembled healthy adult gut metagenomes were run  
675 through two standard methods for phage identification from metagenomic assemblies. The first  
676 method, VIBRANT, uses a hybrid machine learning and protein similarity approach to identify viral  
677 signatures<sup>42</sup>. The second method, VirSorter, predicts protein-coding genes in assembled DNA  
678 sequences and assesses their similarity to known viral proteins<sup>45</sup>.

679

680 VIBRANT (v.1.2.0) was run on assembled scaffolds and the quality and completeness of identified  
681 phages were estimated by CheckV (v.0.7.0)<sup>51</sup> using database v0.6. Low-quality phage scaffolds  
682 were filtered out.

683

684 A similar procedure was performed using VirSorter (v1.0.6, downloaded in February 2018), where  
685 phage contigs were classified as category 1, 2, or 3 depending on confidence level. Category 3  
686 predictions were filtered out before running CheckV.

687

688 Finally, dRep (v3.2.2)<sup>69</sup> was applied to the combined set of quality-filtered phage contigs predicted  
689 by VIBRANT+VirSorter in each sample to extract a unique set of phage genomes based on an  
690 ANI threshold of 0.95 and coverage threshold of 0.5. fastANI was applied for secondary clustering  
691 and genome filters included a minimum length of 1000 bp, an N50 weight of 0, and a size weight  
692 of 1.

693

694 The full list of parameters utilized with the “drep dereplicate” utility was: `-sa 0.95 --S_algorithm`  
695 `fastANI -nc .5 -l 1000 -N50W 0 -sizeW 1 --ignoreGenomeQuality --clusterAlg single`

696

### 697 **Assembly-based method for identifying Adenoviruses in stool samples**

698 The assembled bulk metagenomes from the “four-month” subgroup of the infant cohort were used  
699 to calculate the column labeled “Assembly” in Fig. 5H. FastANI was used to calculate average  
700 nucleotide identity between all assembled contigs in each sample and 1801 *Adenoviridae*  
701 genomes available in NCBI (retrieved by `datasets download genome taxon Adenoviridae`). Each  
702 contig with ANI score  $\geq 95\%$  to at least one *Adenoviridae* genome was counted as an Adenovirus.

703

### 704 **Calculation of dissimilarities between metagenomes**

705

706 Bray-Curtis and Jaccard distances were calculated using the R package `vegan`, version 2.5-7.

707

### 708 **Choosing pairs of metagenomes for overlap analysis**

709

710 For the analyses in Figs. 5C-5D, we wanted to determine how well each type of metagenome  
711 could represent the information in the other, excluding samples with low sequencing depth of the  
712 bulk metagenomes, or low enrichment of virus-enriched metagenomes.

713

714 For the analysis in Fig. 5C, we chose pairs of metagenomes with decent viral enrichment and  
715 deeply sequenced bulk metagenomes. Specifically: (1) We identified the top 50% of samples  
716 based on the percent of reads that Phanta assigned to viruses in the virus-enriched  
717 metagenomes; (2) Of these, we selected 10 samples whose paired bulk metagenomes were the  
718 most deeply sequenced..

719

720 For the analysis in Fig. 5D, we chose pairs of metagenomes with decent bulk sequencing depth  
721 and highly successful viral enrichment. Specifically: (1) We identified the top 50% of samples  
722 based on the sequencing depth of the bulk metagenomes; (2) Of these, we selected 10 samples  
723 with the highest percent of reads that Phanta assigned to viruses in the virus-enriched  
724 metagenomes.

725

#### 726 **Determination of size and number of genomes in each Kraken2/Bracken-compatible** 727 **database tested**

728 To determine the size of each Kraken2/Bracken-compatible database tested (listed in Table 1),  
729 we summed the sizes of the following files and rounded to the nearest GB: hash.k2d, opts.k2d,  
730 taxo.k2d, seqid2taxid.map, database150mers.kmer\_distrib. These are the files necessary for  
731 running Kraken2 and Bracken. We obtained the number of prokaryotic and viral genomes in each  
732 database that we did not construct directly from the relevant publications: Wright *et al.*, 2022 (for  
733 Standard Kraken2 and RefSeq Complete)<sup>39</sup>; Almeida *et al.*, 2021 (for UHGG)<sup>18</sup>; Hiseni *et al.*, 2021  
734 (for HumGut)<sup>19</sup>.

735

736 **Data and code availability**

737

738 Phanta is publicly available at <https://github.com/bhattlab/phanta> with a detailed tutorial  
739 describing installation and usage. Accession numbers of all publicly available metagenomes used  
740 for analysis are provided in Supplementary Table 2. Workflows used for preprocessing and  
741 assembly were used in this manuscript and are available at:  
742 [https://github.com/bhattlab/bhattlab\\_workflows](https://github.com/bhattlab/bhattlab_workflows).

743

744 **Acknowledgements**

745 We thank Dylan Maghini and Boryana Doyle for thoughtful comments on the manuscript, Stephen  
746 Nayfach and Pranvera Hiseni for helpful conversations, Jakob Wirbel for testing Phanta, and Ben  
747 Siranosian and the Stanford Research Computing Center for computational support. Computing  
748 costs were supported, in part, by a NIH S10 Shared Instrumentation Grant 1S10OD02014101.  
749 Figure 1 was created using BioRender.com. This work was supported in part by NIH  
750 R01AI14862302 & R01AI14375702, a Stand Up 2 Cancer Grant, the Chan Zuckerberg Initiative,  
751 a Sloan Foundation Fellowship and the Allen Distinguished Investigator Award (to A.S.B.). Y.P.  
752 is supported by the School of Medicine Dean's Postdoctoral Fellowship. M.C. is supported by an  
753 NIH-funded predoctoral fellowship (5T32HG000044-25) and the National Defense Science and  
754 Engineering Graduate Fellowship (starting September 2022).

755

756

| Database         | Size (GB) | Prokaryotic genomes* | Viral genomes* | Median classification time (sec)** | Median % classified reads** |
|------------------|-----------|----------------------|----------------|------------------------------------|-----------------------------|
| Standard Kraken2 | 51        | 21,920               | 10,489         | 491                                | 56.31                       |
| RefSeq Complete  | 1,192     | 215,725              | 10,863         | 4,889                              | 93.61                       |
| UHGG             | 16        | 4,644                | 0              | 548                                | 88.75                       |
| HumGut           | 26        | 30,691               | 0              | 549                                | 97.57                       |
| Phanta           | 32        | 30,691               | 201,305        | 544                                | 98.07                       |

757 \*Numbers were obtained from the original papers, see Methods.

758 \*\*Classification times and percentages of classified reads were determined by conducting  
759 Kraken2 classification of five random samples from the healthy human cohort from Figure 3,  
760 and calculating median classification times and percentages across the samples.

761

762 **Table 1.** Characteristics of the different Kraken2/Bracken-compatible databases tested in this  
763 study.

764

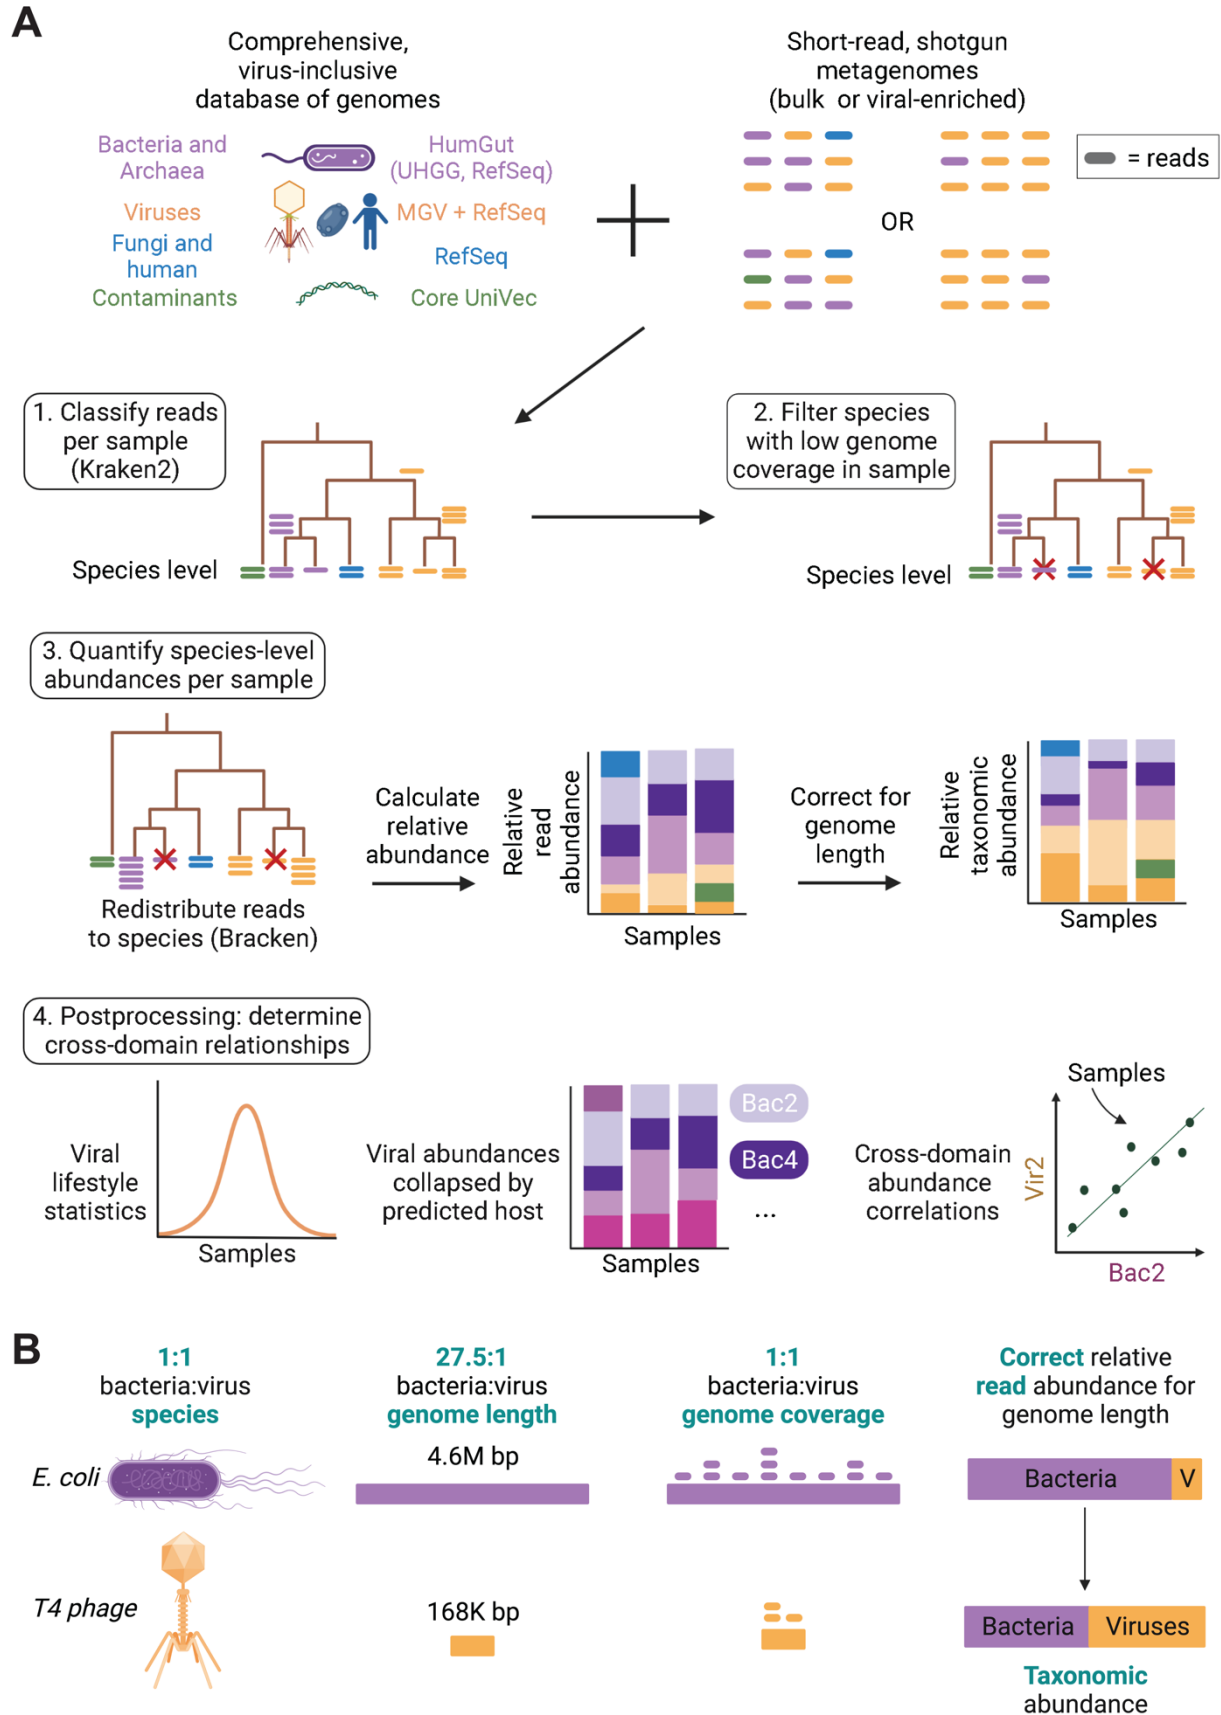

766 **Figure 1. Overview of Phanta's comprehensive, virus-inclusive metagenomic**  
767 **annotation workflow.**

768 **(A)** Phanta's workflow. First, reads from each sample are classified against a  
769 comprehensive, virus-inclusive database of genomes from the human gut. Reads are  
770 classified to the lowest possible taxonomic level. After classification, genome coverage is  
771 estimated for each detected species in each sample. Species with low estimated genome  
772 coverage are filtered out to prevent false positive identifications. Next, Phanta quantifies  
773 the abundances of the remaining species in each sample. Reads originally classified  
774 above the species level (for example to the genus or family level) are redistributed  
775 downwards. Then, two types of abundance are calculated: (1) relative read abundance,  
776 which normalizes species-level read counts by read depth, and (2) relative taxonomic  
777 abundance (see panel B). Post-processing scripts are provided to determine cross-  
778 domain relationships.

779 **(B)** Motivation behind Phanta's provided correction of relative read abundance of relative  
780 taxonomic abundance. Shown here is a simple gut microbial community with a 1:1 ratio  
781 between bacteria and viruses (one bacterium of species *E. coli*; one virus of species T4).  
782 Even if *E. coli* and T4 genomes are equally covered by reads in a shotgun metagenome,  
783 the dramatic difference between their genome lengths will inflate the ratio of bacteria to  
784 viruses, if relative read abundance is used as the metric. By contrast, relative taxonomic  
785 abundance, which corrects for genome length, accurately captures the 1:1 ratio of these  
786 species.

787

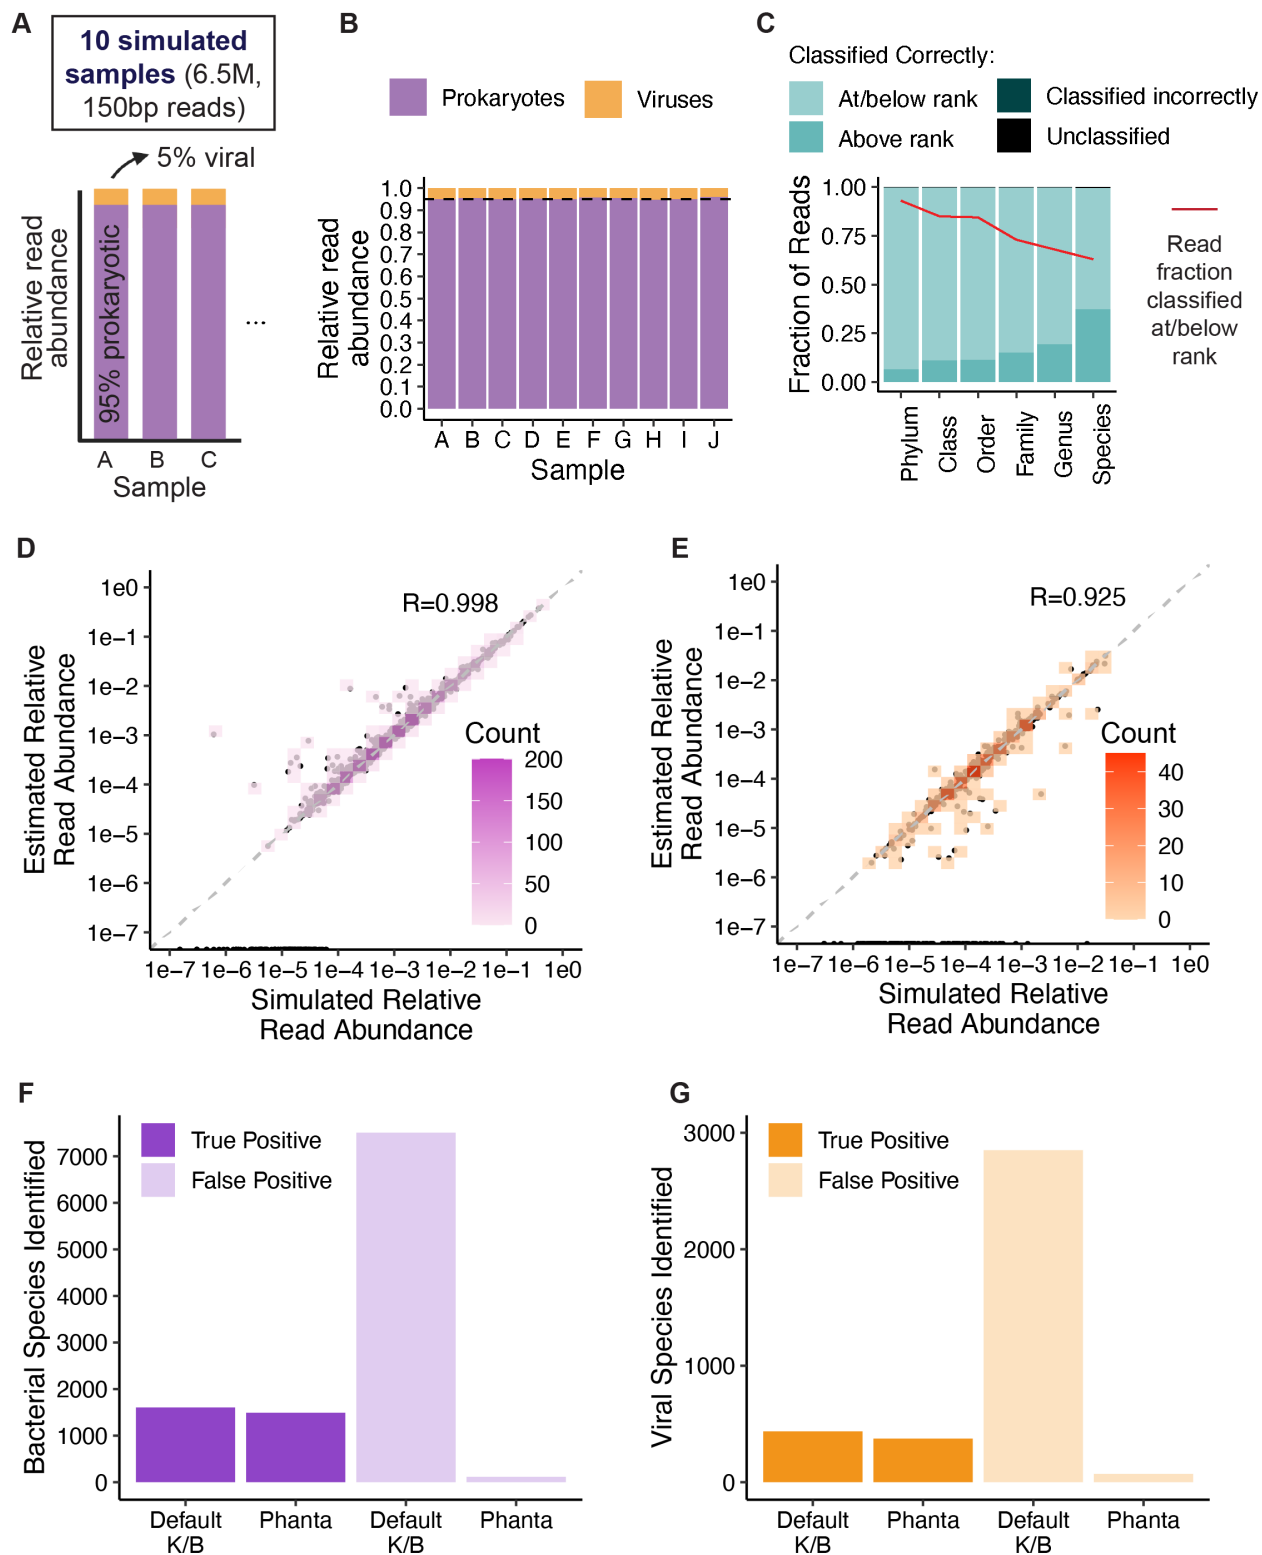

788  
789  
790  
791

792 **Figure 2. Evaluation of Phanta's performance using simulated metagenomes.**

793 **(A)** Composition of simulated metagenomes. Results in (B) - (G) were obtained by  
794 applying Phanta to these simulated metagenomes while using Phanta's default database  
795 and parameters.

796 **(B)** Accuracy of Phanta's final estimates of relative read abundance at the domain level.  
797 The dashed line indicates the true relative read abundance of prokaryotes.

798 **(C)** Accuracy of Phanta's classification step at each taxonomic rank. For each rank, the  
799 two shades of blue represent reads that were classified to a lineage that included the  
800 correct value of the rank. Specifically, light blue shading indicates the median fraction of  
801 reads (across simulated samples) that were classified correctly at or below the rank - e.g.  
802 for family, they were classified either to the correct family, or to the correct genus/species,  
803 which is even more specific than the correct family. Darker blue shading indicates the  
804 median fraction of reads that were classified correctly above the rank - e.g. for family,  
805 they were classified to the correct order or phylum, which is less specific than the correct  
806 family but still accurate. The dark green and black portions of each bar represent reads  
807 that were either: (i) classified to a lineage that did not include the correct value of the rank,  
808 or (ii) unclassified, respectively. The red line indicates the median fraction of classified  
809 reads that were classified at or below each rank (e.g., what fraction of reads were  
810 classified at or below the family level).

811 **(D)** Accuracy of Phanta's final estimates of relative read abundance for 1,606 bacterial  
812 species, across all simulated samples. The dashed line is the  $x=y$  diagonal. Each dot  
813 represents one bacterial species in one simulated sample. The x-axis is the simulated  
814 abundance in the sample, and the y-axis is the abundance estimated by Phanta. The  $R$   
815 value indicates Pearson's correlation coefficient, considering all the dots, i.e. all bacterial  
816 species in all simulated samples. Colors of the overlaid boxes represent numbers (counts)  
817 of dots.

818 **(E)** Same as (D), for 500 viral species.

819 **(F)** Signal-to-noise ratio of bacterial species identified by Phanta vs. the Kraken2/Bracken  
820 workflow, using default parameters for both workflows and using Phanta's default  
821 database as the reference database.

822 **(G)** Same as (F), for viral species.

823



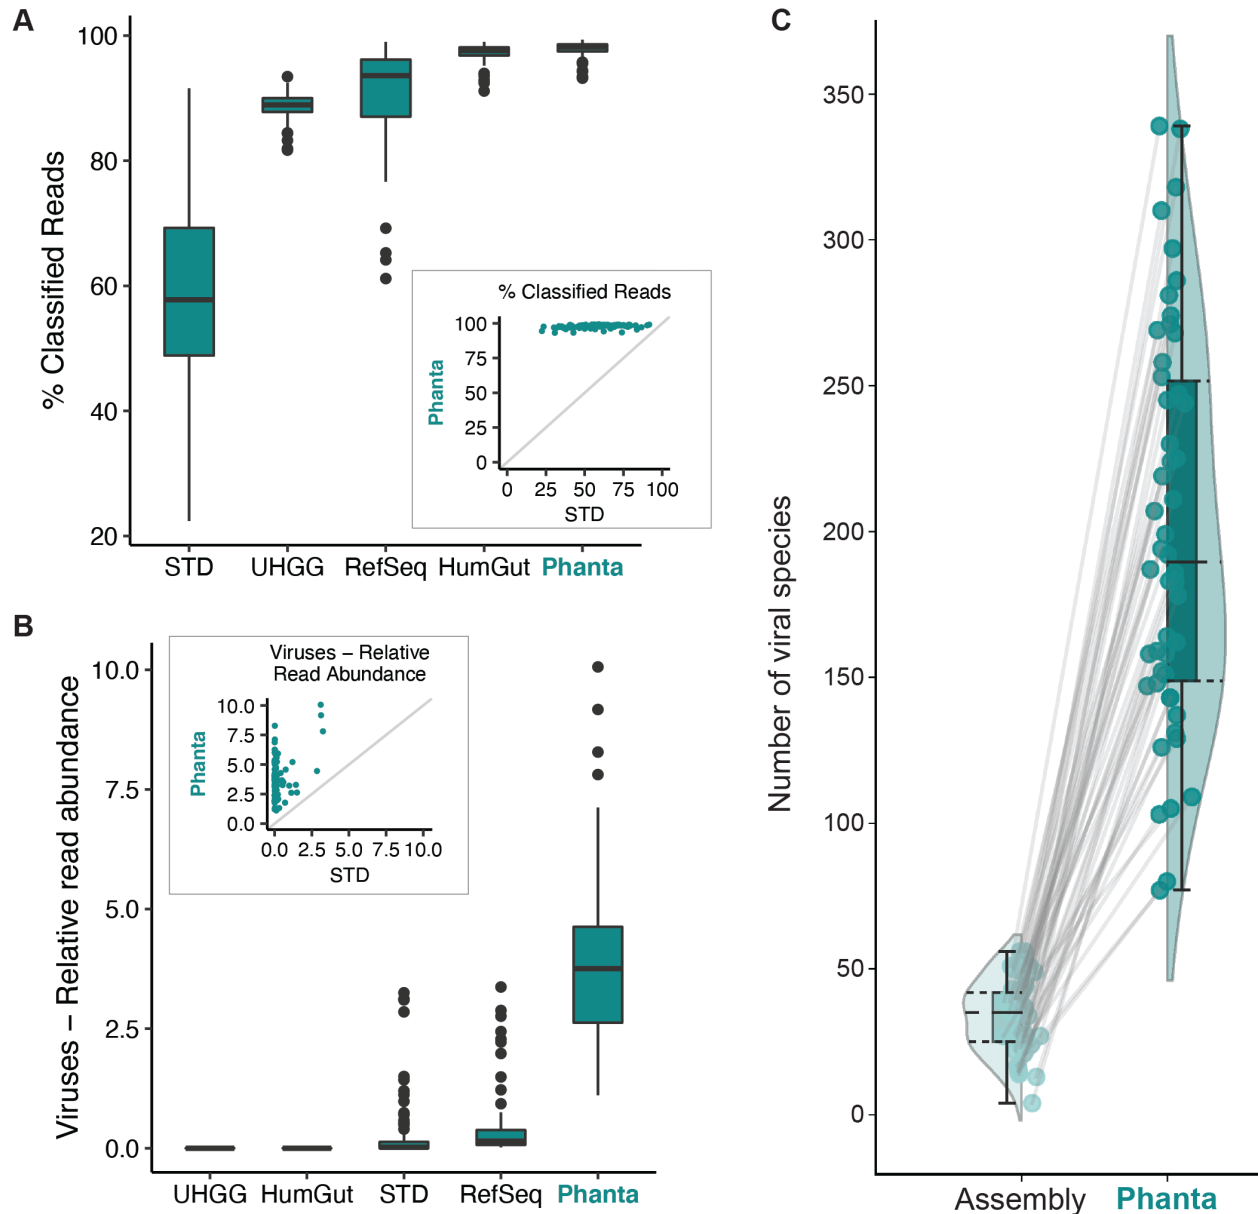

824

825 **Figure 3. Evaluation of Phanta's performance using shotgun gut metagenomes**  
826 **from 245 healthy human adults.** Metagenomes sourced from Yachida *et al.*<sup>43</sup>

827 **(A)** Percentage of sample reads that could be classified during Phanta's initial  
828 classification step using Phanta's default parameters and a variety of Kraken2/Bracken-  
829 compatible databases. Boxplots display the percentage distribution across the set of  
830 metagenomes. Database abbreviations: STD = standard Kraken2<sup>44</sup>, UHGG = Unified  
831 Human Gastrointestinal Genome Collection<sup>18</sup>, RefSeq = RefSeq Complete v205<sup>39</sup>,  
832 HumGut = HumGut<sup>19</sup>, Phanta = Phanta's default database. The insert shows the same  
833 information as the boxplots for STD and Phanta.

834 **(B)** Similar to (A) but comparing the relative read abundance of viruses after Phanta's  
835 filtering and abundance estimation steps.

836 **(C)** Comparing the number of distinct viral species identified by Phanta using the default  
837 database and parameters vs. a standard, assembly-based workflow to identify viral  
838 species in shotgun metagenomes. Dots represent individual metagenomes and lines  
839 are drawn between dots representing the same metagenome. Distributions of dots are  
840 shown using both boxplots and violin plots.

841 **Note:** in all boxplots, boxes represent the interquartile range (IQR), the horizontal line  
842 indicates the median, and whiskers extend between (25th percentile - 1.5\*IQR) and  
843 (75th percentile + 1.5\*IQR).

844

845

846

847

848

849

850

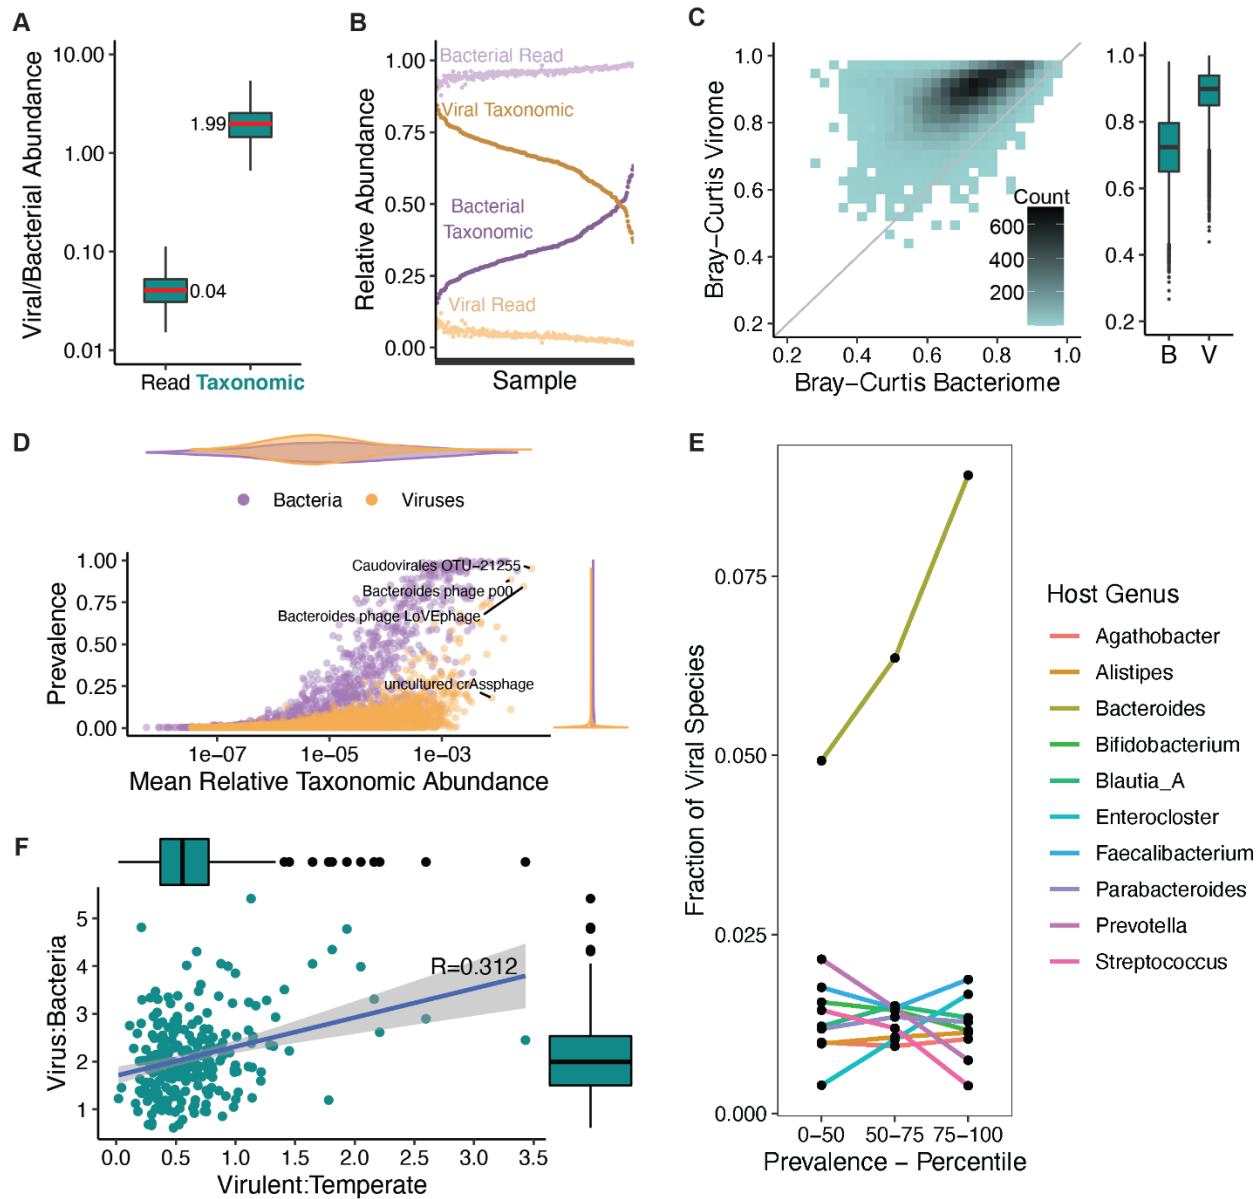

851

852

853

854

855

856

857

858

859

860

861

862

863

**Figure 4. Core properties of the healthy adult virome.** Metagenomes sourced from Yachida *et al.*<sup>43</sup> (same as Figure 3).

(A) Ratio of viral to bacterial abundance in the gut, using relative read abundance vs. relative taxonomic abundance. Boxplots display the distribution of this ratio across the set of 245 healthy adult metagenomes.

(B) Abundance values used to calculate the ratios in (A).

(C) Comparing the variability of the gut phageome and bacteriome across metagenomes. Bray-Curtis dissimilarities were calculated twice between all metagenome pairs, once using relative taxonomic abundances of bacterial species (horizontal axis of scatterplot) and once using relative taxonomic abundances of viral species (vertical axis of scatterplot). The boxplots display the same data - B = bacteriome, V = virome. The gray line on the scatterplot is the  $x=y$  diagonal.

864 **(D)** Abundance and prevalence of bacterial and viral species. Abundance is the mean  
865 relative taxonomic abundance across metagenomes and prevalence is the number of  
866 positive individuals divided by the cohort size (245). Violin plots aligned with the x- and  
867 y-axes represent distributions of abundance and prevalence, respectively.

868 **(E)** Distribution of predicted host genera for viral species in various prevalence  
869 categories (e.g., category 75-100 represents the top 25% of viruses in terms of  
870 prevalence). These results are based on host genus predictions that were made using  
871 iPHoP<sup>65</sup> and are provided in Phanta's default database.

872 **(F)** Relationship between abundance ratio of viruses and bacteria and abundance ratio  
873 of virulent and temperate phages. Boxplots aligned with the x- and y-axes display the  
874 distributions of each ratio. Results are based on viral lifestyle predictions made by  
875 BACPHLIP<sup>64</sup> (provided in Phanta's default database). Displayed *R* is Pearson's  
876 correlation coefficient. Relative taxonomic abundance was used as the abundance  
877 metric. To prevent low quality samples from affecting the analysis, 11 outliers for  
878 sequencing depth - i.e.,  $>1.5 \times \text{IQR}$  above or below the median depth - were removed  
879 ( $n=234$ ).

880 **Note:** in all boxplots, boxes represent the interquartile range (IQR), the horizontal line  
881 indicates the median, and whiskers extend between (25th percentile -  $1.5 \times \text{IQR}$ ) and  
882 (75th percentile +  $1.5 \times \text{IQR}$ ).

883  
884  
885  
886  
887  
888  
889  
890

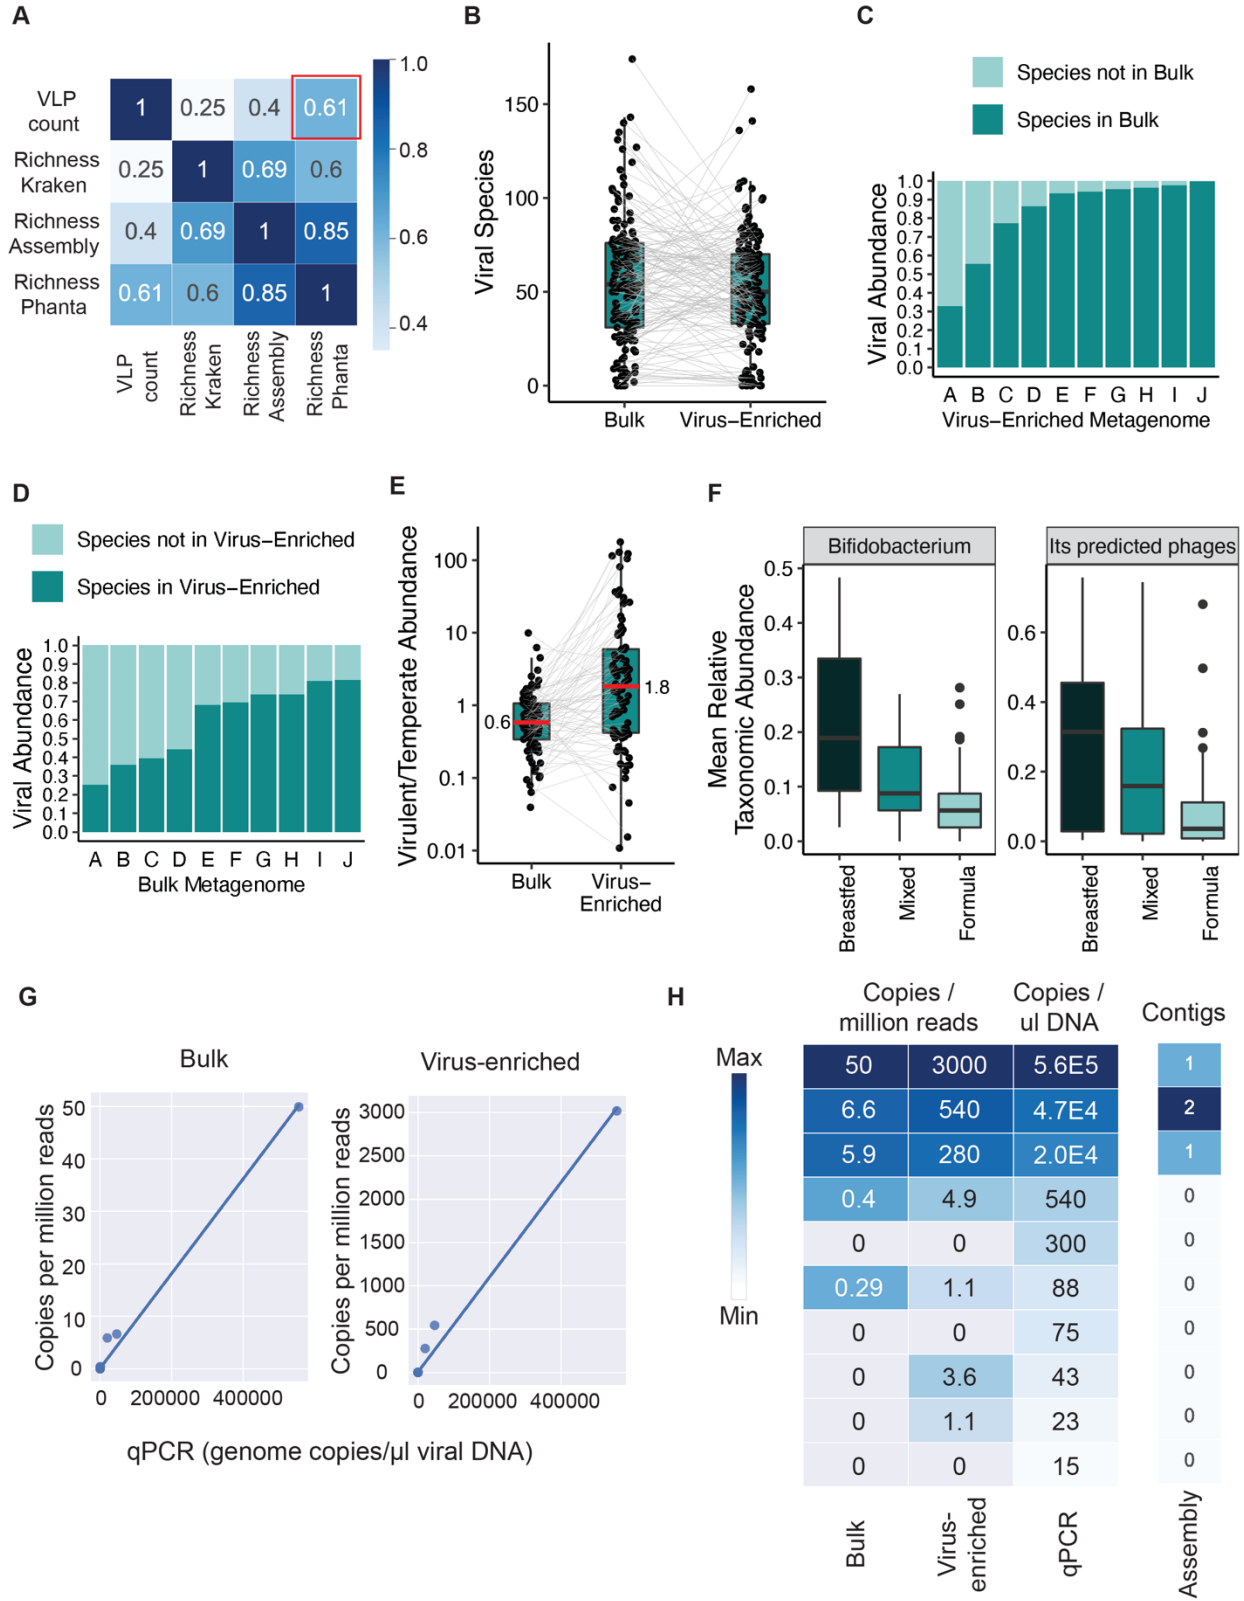

894 **Figure 5. Application of Phanta to paired virus-enriched and bulk metagenomes**  
895 **from the infant gut.** Metagenomes sourced from Liang *et al.*<sup>59</sup> Longitudinal cohort = 20  
896 infants sampled at months 0, 1, and 4 (60 samples total). Four-month cohort = 83 infants  
897 sampled at month 4.

898 **(A)** All-by-all Spearman's correlations between statistics related to viral content, for all  
899 virus-enriched metagenomes from infants in the longitudinal cohort (n=60). Specifically,  
900 four statistics were correlated: (1) VLP Count: number of viral-like particles per gram  
901 feces, (2) Richness Kraken: viral species richness based on applying Kraken2 with a  
902 RefSeq-based database, (3) Richness Assembly: viral species richness based on  
903 applying an assembly-based method, and (4) Richness Phanta: viral species richness  
904 based on applying Phanta. Phanta's richness estimation has the highest correlation with  
905 VLP count (red box). VLP Count, Richness Kraken and Richness Assembly were  
906 originally reported by Liang *et al.*.

907 **(B)** Number of viral species identified by Phanta in all metagenome pairs, from both infant  
908 cohorts. Each dot represents a metagenome and lines connect metagenome pairs.

909 **(C)** Overlap between viral species identified by Phanta in 10 pairs of metagenomes (see  
910 Methods) from infants in the four-month cohort. Each bar represents the total relative  
911 taxonomic abundance of viruses identified in a virus-enriched metagenome. Colors depict  
912 the proportion of this abundance from species also found in the paired bulk metagenome.

913 **(D)** Complementary analysis to (C), showing the proportion of relative taxonomic  
914 abundance in bulk metagenomes from species also found in virus-enriched  
915 metagenomes.

916 **(E)** Abundance ratio of virulent to temperate species detected by Phanta in virus-enriched  
917 and bulk metagenomes from the four-month cohort. Ratios were obtained using one of  
918 Phanta's provided post-processing scripts, along with viral lifestyle predictions that were  
919 made by BACPHLIP and are provided in Phanta's default database.

920 **(F)** Phanta's abundance estimates for *Bifidobacterium* and predicted *Bifidobacterium*  
921 phages in bulk metagenomes from infants in the four-month cohort (who had a range of  
922 diets). This analysis was facilitated by one of Phanta's provided post-processing scripts,  
923 along with host genus predictions that were made by iPHoP<sup>65</sup> and are provided in  
924 Phanta's default database.

925 **(G)** Relationship between the originally reported abundance of Adenovirus in infant stool  
926 samples (based on qPCR), vs. the newly determined abundance, based on applying  
927 Phanta to the corresponding metagenomes. This analysis considered all stool samples  
928 from the four-month cohort; most were negative or weakly positive by both methods (i.e.  
929 plotted close to (0, 0)).

930 **(H)** Heatmap of Adenovirus abundance in stool samples from infants in the four-month  
931 cohort, as determined by four complementary methods. Shown are stool samples  
932 originally reported to be positive for Adenovirus by qPCR. Method abbreviations: qPCR  
933 = qPCR for Adenovirus from DNA extracted from virus-like particles; quantified by  
934 genome copies /  $\mu$ l DNA. Assembly = alignment of assembled contigs from bulk  
935 metagenomes to Adenovirus genomes; quantified by number of contigs identified as  
936 Adenovirus. Bulk/virus-enriched = application of Phanta to bulk or virus-enriched  
937 metagenomes, using the default Phanta database; quantified by genome copies per  
938 million reads.

939 **Note:** in all boxplots, boxes represent the interquartile range (IQR), the horizontal line  
940 indicates the median, and whiskers extend between (25th percentile - 1.5\*IQR) and (75th  
941 percentile + 1.5\*IQR).

942

943

## 944 **References**

945

946 1. Shreiner, A. B., Kao, J. Y. & Young, V. B. The gut microbiome in health and in disease.

947 *Curr. Opin. Gastroenterol.* **31**, 69–75 (2015).

948 2. Pflughoeft, K. J. & Versalovic, J. Human microbiome in health and disease. *Annu. Rev.*

949 *Pathol.* **7**, 99–122 (2012).

950 3. Cryan, J. F. *et al.* The Microbiota-Gut-Brain Axis. *Physiol. Rev.* **99**, 1877–2013 (2019).

951 4. Kau, A. L., Ahern, P. P., Griffin, N. W., Goodman, A. L. & Gordon, J. I. Human nutrition, the

952 gut microbiome and the immune system. *Nature* **474**, 327–336 (2011).

953 5. Tringe, S. G. & Hugenholtz, P. A renaissance for the pioneering 16S rRNA gene. *Curr.*

954 *Opin. Microbiol.* **11**, 442–446 (2008).

955 6. Drewes, J. L. *et al.* High-resolution bacterial 16S rRNA gene profile meta-analysis and

956 biofilm status reveal common colorectal cancer consortia. *NPJ Biofilms Microbiomes* **3**, 34

957 (2017).

958 7. Romano, S. *et al.* Meta-analysis of the Parkinson's disease gut microbiome suggests

959 alterations linked to intestinal inflammation. *NPJ Parkinsons Dis* **7**, 27 (2021).

960 8. Yatsunenkov, T. *et al.* Human gut microbiome viewed across age and geography. *Nature*

961 **486**, 222–227 (2012).

962 9. Davis-Richardson, A. G. *et al.* *Bacteroides dorei* dominates gut microbiome prior to

963 autoimmunity in Finnish children at high risk for type 1 diabetes. *Front. Microbiol.* **5**, 678

964 (2014).

965 10. Xu, W. *et al.* Characterization of Shallow Whole-Metagenome Shotgun Sequencing as a

966 High-Accuracy and Low-Cost Method by Complicated Mock Microbiomes. *Front. Microbiol.*

- 967           **12**, 678319 (2021).
- 968    11. Sharpton, T. J. An introduction to the analysis of shotgun metagenomic data. *Front. Plant*  
969           *Sci.* **5**, 209 (2014).
- 970    12. Quince, C., Walker, A. W., Simpson, J. T., Loman, N. J. & Segata, N. Shotgun  
971           metagenomics, from sampling to analysis. *Nat. Biotechnol.* **35**, 833–844 (2017).
- 972    13. Kunin, V., Copeland, A., Lapidus, A., Mavromatis, K. & Hugenholtz, P. A bioinformatician’s  
973           guide to metagenomics. *Microbiol. Mol. Biol. Rev.* **72**, 557–78, Table of Contents (2008).
- 974    14. Gregory, A. C. *et al.* MetaPop: a pipeline for macro- and microdiversity analyses and  
975           visualization of microbial and viral metagenome-derived populations. *Microbiome* **10**, 49  
976           (2022).
- 977    15. Pandolfo, M., Telatin, A., Lazzari, G., Adriaenssens, E. M. & Vitulo, N. MetaPhage: an  
978           automated pipeline for analyzing, annotating, and classifying bacteriophages in  
979           metagenomics sequencing data. doi:10.1101/2022.04.17.488583.
- 980    16. Shen, W. *et al.* KMCP: accurate metagenomic profiling of both prokaryotic and viral  
981           populations by pseudo-mapping. doi:10.1101/2022.03.07.482835.
- 982    17. Lopera-Maya, E. A. *et al.* Effect of host genetics on the gut microbiome in 7,738  
983           participants of the Dutch Microbiome Project. *Nat. Genet.* **54**, 143–151 (2022).
- 984    18. Almeida, A. *et al.* A unified catalog of 204,938 reference genomes from the human gut  
985           microbiome. *Nat. Biotechnol.* **39**, 105–114 (2021).
- 986    19. Hiseni, P., Rudi, K., Wilson, R. C., Hegge, F. T. & Snipen, L. HumGut: a comprehensive  
987           human gut prokaryotic genomes collection filtered by metagenome data. *Microbiome* **9**, 1–  
988           12 (2021).
- 989    20. Zhernakova, A. *et al.* Population-based metagenomics analysis reveals markers for gut  
990           microbiome composition and diversity. *Science* **352**, 565–569 (2016).
- 991    21. O’Leary, N. A. *et al.* Reference sequence (RefSeq) database at NCBI: current status,  
992           taxonomic expansion, and functional annotation. *Nucleic Acids Res.* **44**, D733–45 (2016).



- 993 22. Wood, D. E., Lu, J. & Langmead, B. Improved metagenomic analysis with Kraken 2.  
994 *Genome Biol.* **20**, 257 (2019).
- 995 23. Segata, N. *et al.* Metagenomic microbial community profiling using unique clade-specific  
996 marker genes. *Nat. Methods* **9**, 811–814 (2012).
- 997 24. Wood, D. E. & Salzberg, S. L. Kraken: ultrafast metagenomic sequence classification using  
998 exact alignments. *Genome Biol.* **15**, R46 (2014).
- 999 25. Khan Mirzaei, M. *et al.* Challenges of Studying the Human Virome - Relevant Emerging  
1000 Technologies. *Trends Microbiol.* **29**, 171–181 (2021).
- 1001 26. Sutton, T. D. S., Clooney, A. G., Ryan, F. J., Ross, R. P. & Hill, C. Choice of assembly  
1002 software has a critical impact on virome characterisation. *Microbiome* **7**, 12 (2019).
- 1003 27. Nayfach, S. *et al.* Metagenomic compendium of 189,680 DNA viruses from the human gut  
1004 microbiome. *Nature Microbiology* **6**, 960–970 (2021).
- 1005 28. Bharti, R. & Grimm, D. G. Current challenges and best-practice protocols for microbiome  
1006 analysis. *Brief. Bioinform.* **22**, 178–193 (2021).
- 1007 29. Ghurye, J. S., Cepeda-Espinoza, V. & Pop, M. Metagenomic Assembly: Overview,  
1008 Challenges and Applications. *Yale J. Biol. Med.* **89**, 353–362 (2016).
- 1009 30. Rose, R., Constantinides, B., Tapinos, A., Robertson, D. L. & Prospero, M. Challenges in  
1010 the analysis of viral metagenomes. *Virus Evol* **2**, vew022 (2016).
- 1011 31. Gregory, A. C. *et al.* The Gut Virome Database Reveals Age-Dependent Patterns of Virome  
1012 Diversity in the Human Gut. *Cell Host Microbe* **28**, 724–740.e8 (2020).
- 1013 32. Soto-Perez, P. *et al.* CRISPR-Cas System of a Prevalent Human Gut Bacterium Reveals  
1014 Hyper-targeting against Phages in a Human Virome Catalog. *Cell Host Microbe* **26**, 325–  
1015 335.e5 (2019).
- 1016 33. Paez-Espino, D. *et al.* IMG/VR v.2.0: an integrated data management and analysis system  
1017 for cultivated and environmental viral genomes. *Nucleic Acids Res.* **47**, D678–D686 (2019).
- 1018 34. Tisza, M. J. & Buck, C. B. A catalog of tens of thousands of viruses from human

- 1019 metagenomes reveals hidden associations with chronic diseases. *Proc. Natl. Acad. Sci. U.*  
1020 *S. A.* **118**, (2021).
- 1021 35. Camarillo-Guerrero, L. F., Almeida, A., Rangel-Pineros, G., Finn, R. D. & Lawley, T. D.  
1022 Massive expansion of human gut bacteriophage diversity. *Cell* **184**, 1098–1109.e9 (2021).
- 1023 36. Benler, S. *et al.* Thousands of previously unknown phages discovered in whole-community  
1024 human gut metagenomes. *Microbiome* **9**, 1–17 (2021).
- 1025 37. Van Espen, L. *et al.* A Previously Undescribed Highly Prevalent Phage Identified in a  
1026 Danish Enteric Virome Catalog. *mSystems* **6**, e0038221 (2021).
- 1027 38. Lu J, Breitwieser FP, Thielen P, Salzberg SL. Bracken: estimating species abundance in  
1028 metagenomics data. *PeerJ Computer Science* **3**, (2017).
- 1029 39. Wright, R. J., Comeau, A. M. & Langille, M. G. I. From defaults to databases: parameter  
1030 and database choice dramatically impact the performance of metagenomic taxonomic  
1031 classification tools. *bioRxiv* 2022.04.27.489753 (2022) doi:10.1101/2022.04.27.489753.
- 1032 40. Breitwieser, F. P., Baker, D. N. & Salzberg, S. L. KrakenUniq: confident and fast  
1033 metagenomics classification using unique k-mer counts. *Genome Biol.* **19**, 198 (2018).
- 1034 41. Sun, Z. *et al.* Challenges in benchmarking metagenomic profilers. *Nat. Methods* **18**, 618–  
1035 626 (2021).
- 1036 42. Kieft, K., Zhou, Z. & Anantharaman, K. VIBRANT: automated recovery, annotation and  
1037 curation of microbial viruses, and evaluation of viral community function from genomic  
1038 sequences. *Microbiome* **8**, 90 (2020).
- 1039 43. Yachida, S. *et al.* Metagenomic and metabolomic analyses reveal distinct stage-specific  
1040 phenotypes of the gut microbiota in colorectal cancer. *Nat. Med.* **25**, 968–976 (2019).
- 1041 44. Index zone by BenLangmead. <https://benlangmead.github.io/aws-indexes/k2>.
- 1042 45. Roux, S., Enault, F., Hurwitz, B. L. & Sullivan, M. B. VirSorter: mining viral signal from  
1043 microbial genomic data. *PeerJ* **3**, e985 (2015).
- 1044 46. Guo, J. *et al.* VirSorter2: a multi-classifier, expert-guided approach to detect diverse DNA

- 1045 and RNA viruses. *Microbiome* **9**, 37 (2021).
- 1046 47. Ren, J. *et al.* Identifying viruses from metagenomic data using deep learning. *Quant Biol* **8**,  
1047 64–77 (2020).
- 1048 48. Ren, J., Ahlgren, N. A., Lu, Y. Y., Fuhrman, J. A. & Sun, F. VirFinder: a novel k-mer based  
1049 tool for identifying viral sequences from assembled metagenomic data. *Microbiome* **5**, 69  
1050 (2017).
- 1051 49. Amgarten, D., Braga, L. P. P., da Silva, A. M. & Setubal, J. C. MARVEL, a Tool for  
1052 Prediction of Bacteriophage Sequences in Metagenomic Bins. *Front. Genet.* **9**, 304 (2018).
- 1053 50. Nurk, S., Meleshko, D., Korobeynikov, A. & Pevzner, P. A. metaSPAdes: a new versatile  
1054 metagenomic assembler. *Genome Res.* **27**, 824–834 (2017).
- 1055 51. Nayfach, S. *et al.* CheckV assesses the quality and completeness of metagenome-  
1056 assembled viral genomes. *Nat. Biotechnol.* **39**, 578–585 (2021).
- 1057 52. Moreno-Gallego, J. L. *et al.* Virome Diversity Correlates with Intestinal Microbiome Diversity  
1058 in Adult Monozygotic Twins. *Cell Host Microbe* **25**, 261–272.e5 (2019).
- 1059 53. Chen, W. *et al.* Vast human gut virus diversity uncovered by combined short- and long-read  
1060 sequencing. doi:10.1101/2022.07.03.498593.
- 1061 54. Shkoporov, A. N. *et al.* The Human Gut Virome Is Highly Diverse, Stable, and Individual  
1062 Specific. *Cell Host Microbe* **26**, 527–541.e5 (2019).
- 1063 55. Stachler, E. & Bibby, K. Metagenomic Evaluation of the Highly Abundant Human Gut  
1064 Bacteriophage CrAssphage for Source Tracking of Human Fecal Pollution. *Environ. Sci.*  
1065 *Technol. Lett.* **1**, 405–409 (2014).
- 1066 56. Dutilh, B. E. *et al.* A highly abundant bacteriophage discovered in the unknown sequences  
1067 of human faecal metagenomes. *Nature Communications* vol. 5 (2014).
- 1068 57. Benler, S. *et al.* A diversity-generating retroelement encoded by a globally ubiquitous  
1069 Bacteroides phage. *Microbiome* **6**, 191 (2018).
- 1070 58. Kleiner, M., Hooper, L. V. & Duerkop, B. A. Evaluation of methods to purify virus-like

- 1071 particles for metagenomic sequencing of intestinal viromes. *BMC Genomics* **16**, 7 (2015).
- 1072 59. Liang, G. *et al.* The stepwise assembly of the neonatal virome is modulated by  
1073 breastfeeding. *Nature* **581**, 470–474 (2020).
- 1074 60. Krishnamurthy, S. R. & Wang, D. Origins and challenges of viral dark matter. *Virus Res.*  
1075 **239**, 136–142 (2017).
- 1076 61. Roux, S., Hallam, S. J., Woyke, T. & Sullivan, M. B. Viral dark matter and virus–host  
1077 interactions resolved from publicly available microbial genomes. *eLife* vol. 4 (2015).
- 1078 62. Jain, C., Rodriguez-R, L. M., Phillippy, A. M., Konstantinidis, K. T. & Aluru, S. High  
1079 throughput ANI analysis of 90K prokaryotic genomes reveals clear species boundaries.  
1080 *Nat. Commun.* **9**, 1–8 (2018).
- 1081 63. Quinlan, A. R. & Hall, I. M. BEDTools: a flexible suite of utilities for comparing genomic  
1082 features. *Bioinformatics* vol. 26 841–842 (2010).
- 1083 64. Hockenberry, A. J. & Wilke, C. O. BACPHLIP: predicting bacteriophage lifestyle from  
1084 conserved protein domains. *PeerJ* **9**, e11396 (2021).
- 1085 65. Roux, S. *et al.* iPHoP: an integrated machine-learning framework to maximize host  
1086 prediction for metagenome-assembled virus genomes. (2022)  
1087 doi:10.1101/2022.07.28.501908.
- 1088 66. Watts, S. C., Ritchie, S. C., Inouye, M. & Holt, K. E. FastSpar: rapid and scalable  
1089 correlation estimation for compositional data. *Bioinformatics* **35**, 1064–1066 (2019).
- 1090 67. Friedman, J. & Alm, E. J. Inferring Correlation Networks from Genomic Survey Data. *PLoS*  
1091 *Comput. Biol.* **8**, e1002687 (2012).
- 1092 68. Fritz, A. *et al.* CAMISIM: simulating metagenomes and microbial communities. *Microbiome*  
1093 **7**, 17 (2019).
- 1094 69. Olm, M. R., Brown, C. T., Brooks, B. & Banfield, J. F. dRep: a tool for fast and accurate  
1095 genomic comparisons that enables improved genome recovery from metagenomes through  
1096 de-replication. *ISME J.* **11**, 2864–2868 (2017).
